# Supplementary material
Source: PubMed Central journal article supplement (PMC3754193)
Supplement: IAI.00268-13_zii999090279so1.pdf [file IAI.00268-13_zii999090279so1.pdf]

# ONLINE SUPPLEMENTAL DATA

## Altered innate defenses in the neonatal gastrointestinal tract in response to colonization by neuropathogenic *Escherichia coli*

George M.H. Birchenough, Malin E.V. Johansson, Richard A. Stabler, Fatma Dalgakiran, Gunnar C. Hansson, Brendan W. Wren, J. Paul Luzio, and Peter W. Taylor

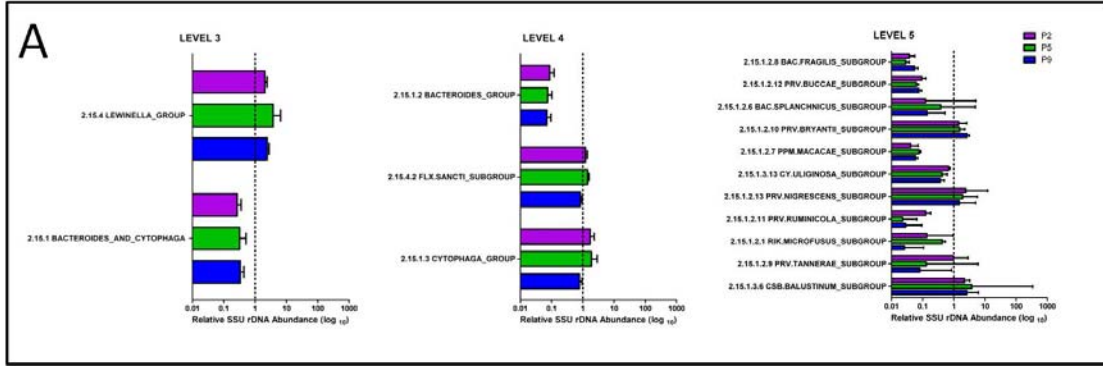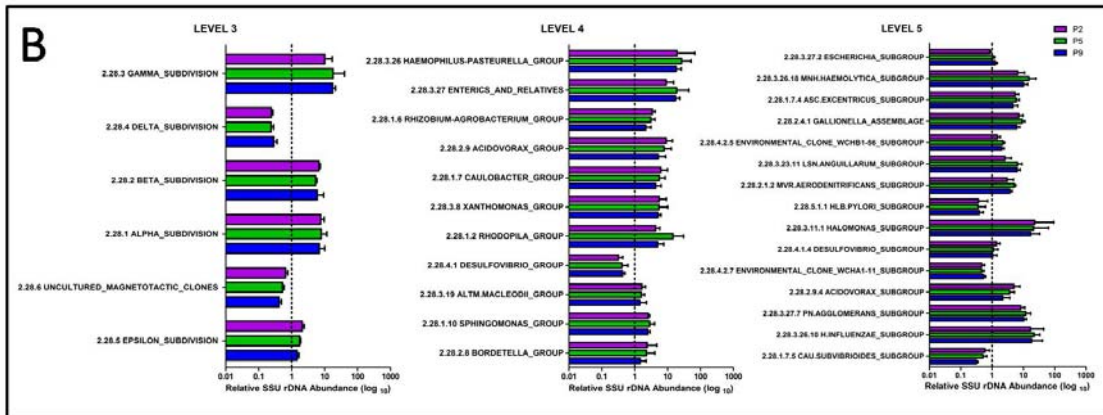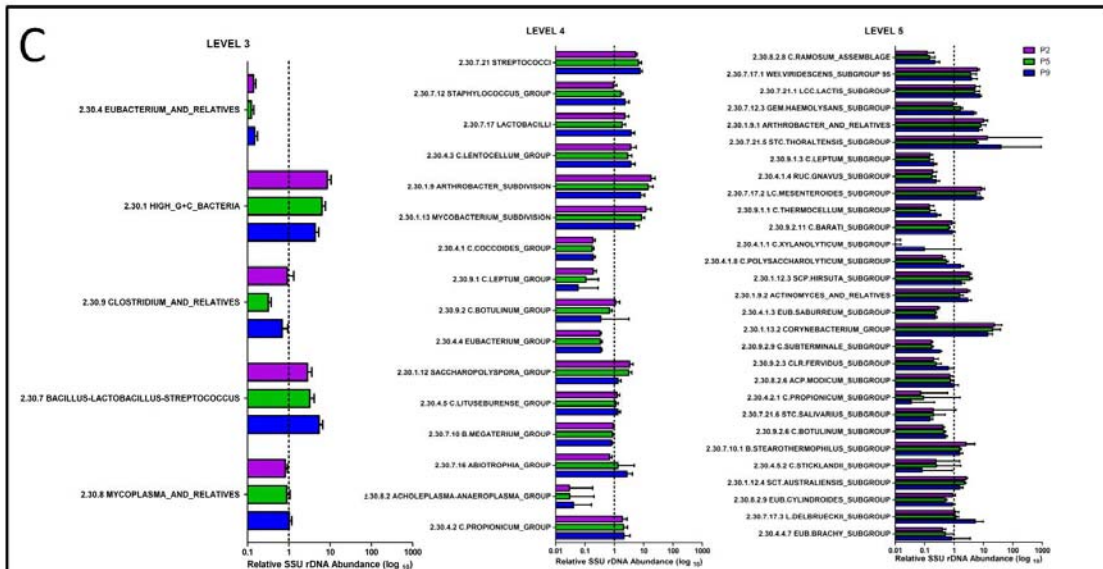

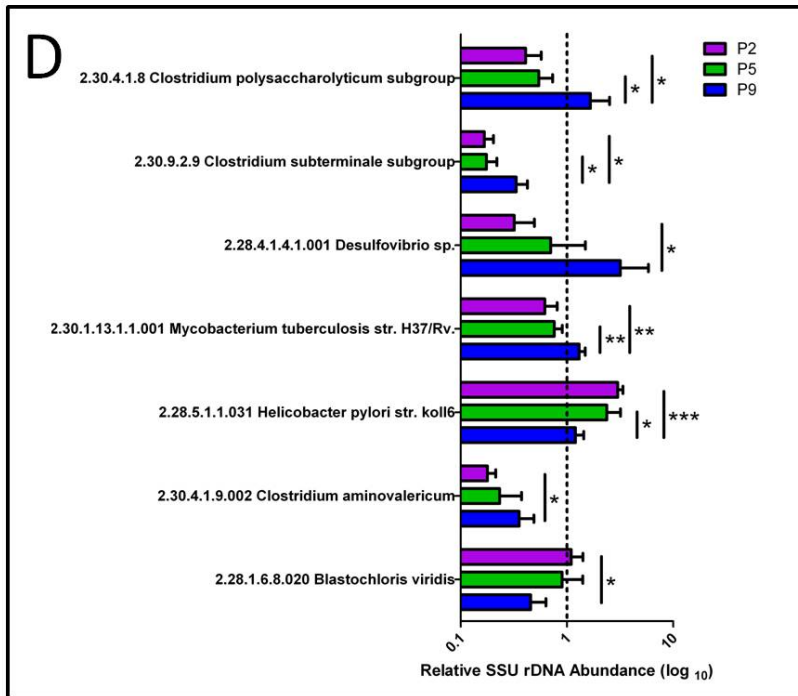

**Figure S1. Comparative sub-phylum phylogenetic analysis of the composition of the GI tract microbiota of P2, P5 and P9 rat pups**

Relative abundance of amplified SSU rDNA sequences from P2, P5 and P9 samples binding to class (level 3), order/family (level 4) and genus (level 5) taxonomic level microarray probes from the Bacteroidetes (A), Proteobacteria (B) and Firmicute/Actinobacteria (C) phyla. Relative abundance of SSU rDNA corresponding to 2 genus level and 5 species level probes showed significant differences between P2/P5 and P9 samples (D). P2, P5 and P9 neonatal data were normalized to adult data as indicated by the dashed lines at  $x=1$ . Numeric codes correspond to Ribosomal Database Project (<http://rdp.cme.msu.edu/index.jsp>) classifications for the indicated taxonomic level probes. Probes were ranked according to average Cy5 and Cy3 fluorescence across the P2, P5, and P9 datasets, with the highest at the top of each figure. Degrees of significance as determined by 2-tailed t-test are indicated in D (\* =  $<0.05$ , \*\* =  $<0.01$ , \*\*\* =  $<0.001$ ). We determined that the *M. tuberculosis* probe sequence included in the Agilent microarray is also present in other mycobacteria with 100% identity and binding to this probe does not therefore necessarily indicate the presence of this species.

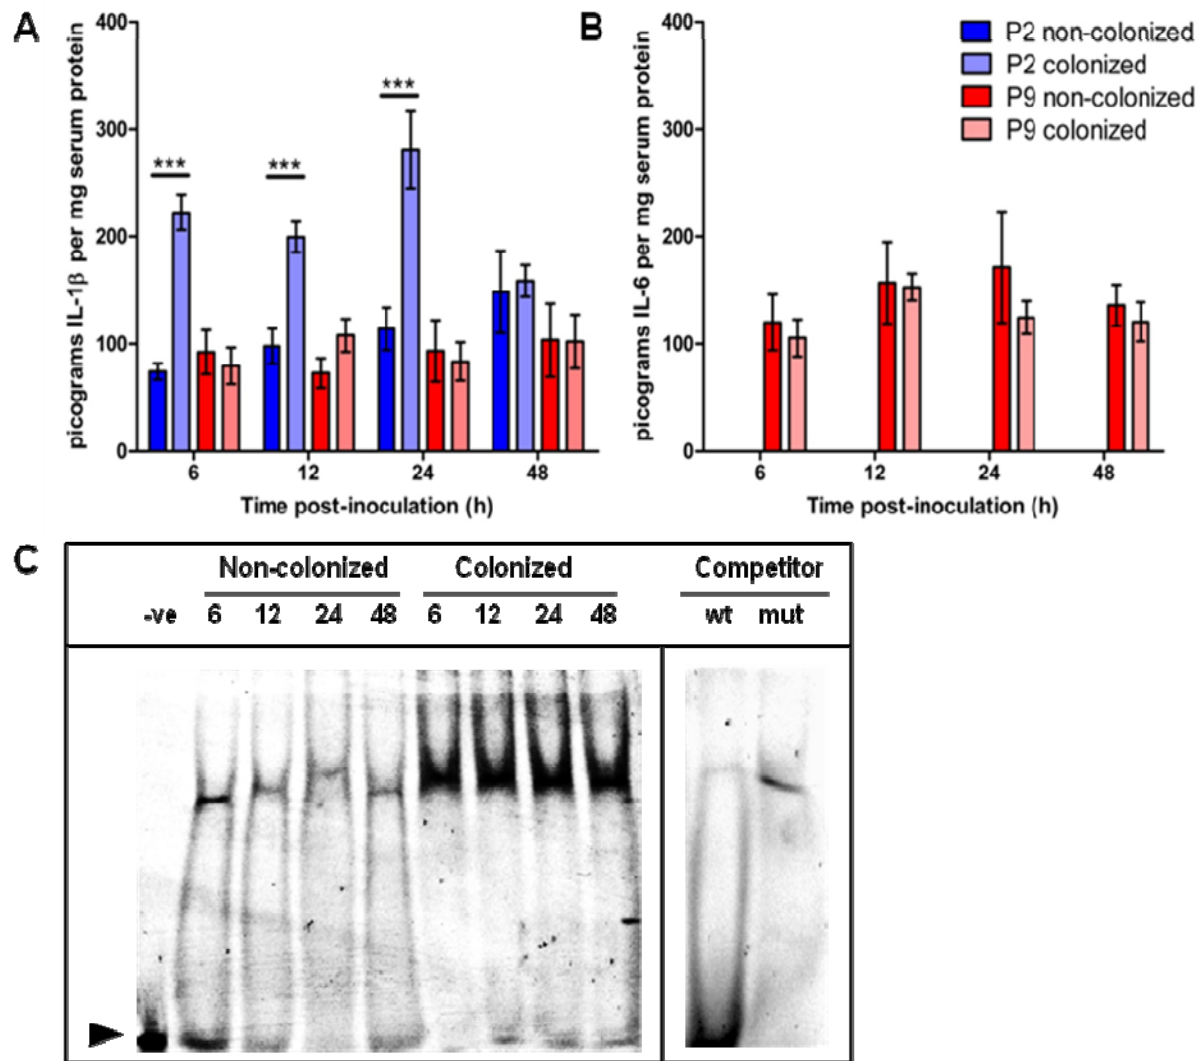

**Figure S2. IL-1 $\beta$  and IL-6 serum cytokine levels in P2 and P9 pups, and active NF- $\kappa$ B nuclear localization in P2 neonates colonized with *E. coli* K1.** Serum cytokine levels of IL-1 $\beta$  (A) and IL-6 (B) were determined for non-colonized and *E. coli* K1-colonized P2 and P9 animals by sandwich-ELISA of serum from blood from animals culled 6, 12, 24 and 48 hours after feeding either broth or *E. coli* A192PP. Error bars represent the SEM (n=6); significance was determined by two-tailed t-test between colonized and non-colonized animals as indicated (\*  $p < 0.05$ , \*\*  $p < 0.01$ , \*\*\*  $p < 0.001$ ). (C) The extent of active (DNA-binding) NF- $\kappa$ B localization to intestinal tissue cell nuclei was determined by electrophoretic mobility shift assay of pooled nuclear protein extracted from non-colonized and *E. coli* K1 colonized P2 neonates 6, 12, 24 and 48 h after feeding either broth or *E. coli* A192PP. Assays were performed using a Cy5 labeled dsDNA probe, containing the NF- $\kappa$ B binding motif, in the presence (+ve) or absence (-ve) of protein extract. Assay specificity was assessed by binding reactions in presence of a non-labeled wild-type (wt) or mutant (mut) competitor dsDNA. The position of unbound Cy5 labeled probe is indicated ( $\blacktriangleright$ ).

**Table S1. Functional categorization of genes altered at least twofold in P2 and P9 GI tract tissues 12 h after feeding of *E. coli* A192PP**

| Functional category <sup>a</sup>         | P2  |      | P9  |      |
|------------------------------------------|-----|------|-----|------|
|                                          | Up  | Down | Up  | Down |
| Adhesion and migration                   | 8   | 2    | 13  |      |
| Angiogenesis                             | 1   |      | 2   |      |
| Apoptosis                                | 1   | 1    | 9   | 2    |
| Coagulation                              |     |      |     | 1    |
| Cytoskeletal reorganization              | 4   |      | 12  | 6    |
| DNA repair                               | 2   |      | 5   | 3    |
| Electron transport                       | 1   |      | 3   | 6    |
| Exocytosis/endocytosis                   | 2   |      | 8   | 1    |
| Growth, differentiation and development  | 28  | 3    | 43  | 14   |
| Inflammation, immune and stress response | 8   | 4    | 13  | 8    |
| Integral membrane proteins <sup>b</sup>  | 4   |      | 8   | 5    |
| Iron homeostasis                         |     |      | 1   |      |
| Metabolism: biosynthesis and catabolism  | 18  | 7    | 26  | 27   |
| Nuclear structure                        | 8   |      | 2   | 4    |
| Protein and RNA processing               | 27  | 6    | 37  | 23   |
| Signal transduction                      | 13  |      | 48  | 10   |
| Transcriptional regulation               | 33  |      | 34  | 14   |
| Transport                                | 13  | 1    | 34  | 12   |
|                                          |     |      |     |      |
| Number of genes affected                 | 267 | 35   | 367 | 282  |
| Number of genes categorized <sup>c</sup> | 171 | 24   | 298 | 136  |

<sup>a</sup>The number of genes in each category is shown. Genes were assigned manually to functional categories as broadly defined by Moen et al. (Microb. Pathogen. 2008; 44, 293-310); multifunctional proteins were assigned based on their primary role according to the GeneSpring database. Arrays were performed by pooling equimolar amounts of RNA from three infected rats and compared with tissues from uninfected control animals processed in the same way

<sup>b</sup>Genes encoding molecules with features of transmembrane proteins but of no known function were assigned to this group

<sup>c</sup>Genes encoding non-membrane proteins with no known function according to GeneSpring database were excluded from this analysis

**Table S2. Genes up-regulated twofold or greater in the neonatal rat GI tract 12 h after feeding *E. coli* A192PP to P2 pups**

| Gene symbol | Description                                                     | Function                                                 | Mean-fold change |
|-------------|-----------------------------------------------------------------|----------------------------------------------------------|------------------|
| RT1-Aw2     | RT1 class Ib, locus Aw2                                         | Antigen presentation                                     | 17.71            |
| Fam13a1     | family with sequence similarity 13, member A1                   | Regulation of small GTPase mediated signal transduction  | 8.45             |
| Malat1      | metastasis associated lung adenocarcinoma transcript 1          | Non-protein coding regulator of cell motility            | 6.22             |
| Btg2        | BTG family, member 2                                            | Negative regulator of cell proliferation                 | 5.38             |
| Luc7l3      | LUC7-like 3                                                     | RNA binding regulator of apoptosis                       | 5.26             |
| Setd5       | SET domain containing 5                                         | Unknown                                                  | 5.11             |
| Wdfy1       | WD repeat and FYVE domain containing 1                          | Endosomal trafficking protein                            | 5.08             |
| Eif2c2      | eukaryotic translation initiation factor 2C, 2                  | Regulator of RNA mediated gene silencing                 | 5.05             |
| Pdlim5      | PDZ and LIM domain 5                                            | Regulator of cytoskeletal organization                   | 5.05             |
| Cirbp       | cold inducible RNA binding protein                              | Positive regulator of cellular stress response           | 5.04             |
| Zeb2        | zinc finger E-box binding homeobox 2                            | Negative regulator of cell-cell adhesion                 | 4.89             |
| Sltm        | SAFB-like, transcription modulator                              | Transcriptional inhibitor promoting apoptosis            | 4.86             |
| Tiparp      | TCDD-inducible poly(ADP-ribose) polymerase                      | Protein ADP ribosylation                                 | 4.77             |
| Sv2b        | synaptic vesicle glycoprotein 2b                                | Endocrine cell transmembrane transporter                 | 4.75             |
| Hhip        | hedgehog-interacting protein                                    | Negative regulator of angiogenesis                       | 4.64             |
| Mfap3       | microfibrillar-associated protein 3                             | Component of the elastin-associated microfibrils         | 4.54             |
| Pja2        | praja 2, RING-H2 motif containing                               | Ubiquitin-protein ligase                                 | 4.51             |
| Swi5        | SWI5 recombination repair homolog                               | DNA repair complex component                             | 4.50             |
| Mllt10      | myeloid/lymphoid or mixed-lineage leukemia (trithorax homolog)  | Transcription factor                                     | 4.39             |
| Slc6a6      | solute carrier family 6 (neurotransmitter transporter, taurine) | Taurine transporter                                      | 4.31             |
| Evi5        | ecotropic viral integration site 5                              | Regulator of cell cycle and cytokinesis                  | 4.30             |
| Ednrb       | endothelin receptor type B                                      | Non-specific receptor for endothelin                     | 4.29             |
| Ddx6        | DEAD (Asp-Glu-Ala-Asp) box polypeptide 6                        | RNA degradation in cellular stress response              | 4.28             |
| Clec2h      | C-type lectin domain family 2 member H                          | Regulator of natural killer cell-mediated cytotoxicity   | 4.18             |
| Bcl11b      | B-cell CLL/lymphoma 11B (zinc finger protein)                   | Lymphocyte transcription factor                          | 4.05             |
| Tmed5       | transmembrane emp24 protein transport domain                    | Type I membrane protein, unknown function                | 4.04             |
| Srrm1       | serine/arginine repetitive matrix 1                             | Spliceosome component                                    | 3.96             |
| Xiap        | X-linked inhibitor of apoptosis                                 | Apoptotic suppressor                                     | 3.91             |
| Cald1       | caldesmon 1                                                     | Regulator of actin/myosin interactions                   | 3.88             |
| Lpgat1      | lysophosphatidylglycerol acyltransferase 1                      | Catalyzes the reacylation of LPG to phosphatidylglycerol | 3.68             |
| Smurf2      | SMAD specific E3 ubiquitin protein ligase 2                     | E3 ubiquitin-protein ligase                              | 3.56             |
| Arid4a      | AT rich interactive domain 4A (Rbp1 like)                       | Transcriptional repressor                                | 3.55             |
| Aff4        | AF4/FMR2 family, member 4                                       | Transcription factor                                     | 3.47             |
| Gpatch8     | G patch domain containing 8                                     | RNA binding protein, unknown function                    | 3.44             |
| Igfbp5      | insulin-like growth factor binding protein 5                    | Regulator of cellular growth factors                     | 3.44             |
| Sptbn1      | spectrin, beta, non-erythrocytic 1                              | Actin-membrane molecular scaffold protein                | 3.43             |
| Nipbl       | nipped-B homolog                                                | DNA repair complex component                             | 3.41             |
| LOC81816    | hypothetical protein LOC81816                                   | Putative ubiquitin conjugating enzyme                    | 3.39             |
| N4bp1       | Nedd4 binding protein 1                                         | Inhibitor of the E3 ubiquitin-protein ligase ITCH        | 3.37             |
| Tmem161b    | transmembrane protein 161B                                      | Multipass membrane protein, unknown function             | 3.37             |
| Spnb2       | spectrin $\beta$ 2                                              | Actin-membrane molecular scaffold protein                | 3.31             |

|              |                                                                      |                                                                      |      |
|--------------|----------------------------------------------------------------------|----------------------------------------------------------------------|------|
| Atp8b1       | ATPase, Class I, type 8B, member 1                                   | Transport of bile acids from intestinal contents to mucosa           | 3.31 |
| Jarid1a      | jumonji, AT rich interactive domain 1A (Rbp2 like)                   | Histone demethylase regulating cell proliferation                    | 3.28 |
| Pum1         | pumilio homolog 1                                                    | RNA binding protein regulating cell proliferation                    | 3.28 |
| Dock4        | dedicator of cytokinesis 4                                           | Regulator of cell-cell adhesion                                      | 3.27 |
| Eif2c1       | eukaryotic translation initiation factor 2C, 1                       | Regulator of RNA mediated gene silencing                             | 3.3  |
| Znf292       | zinc finger protein 292                                              | Putative transcriptional regulator                                   | 3.26 |
| Sfrs2ip      | splicing factor, arginine/serine-rich 2, interacting protein         | Regulator of spliceosome assembly                                    | 3.24 |
| Eif3c        | eukaryotic translation initiation factor 3, subunit C                | Initiator of protein synthesis                                       | 3.18 |
| Csnk2a1      | casein kinase 2, $\alpha$ 1 polypeptide                              | Serine/threonine protein kinase regulating cell proliferation        | 3.18 |
| Ptprb        | protein tyrosine phosphatase, receptor type, B                       | Signalling protein involved in maintenance of endothelial integrity  | 3.15 |
| LOC100192313 | hypothetical protein LOC100192313                                    | Unknown                                                              | 3.13 |
| Cmip         | c-Maf-inducing protein                                               | Signalling protein involved in Th2 cell activation                   | 3.11 |
| LOC687839    | hypothetical protein LOC687839                                       | Unknown function                                                     | 3.09 |
| Zfp451       | zinc finger protein 451                                              | Putative transcriptional regulator                                   | 3.05 |
| Tnrc6b       | trinucleotide repeat containing 6B                                   | Regulator of RNA mediated gene silencing                             | 3.05 |
| Dek          | DEK oncogene                                                         | Involved in splice site selection during mRNA processing             | 3.05 |
| Acbd3        | acyl-Coenzyme A binding domain containing 3                          | Maintenance of Golgi structure                                       | 3.04 |
| Rad26l       | putative repair and recombination helicase                           | Putative DNA repair enzyme                                           | 3.01 |
| Srpk2        | SFRS protein kinase 2                                                | Spliceosome assembly and trafficking of splicing factors             | 3.00 |
| Hspca        | heat shock protein 90 $\alpha$ (cytosolic), class A member 1         | Molecular chaperone induced by cellular stress                       | 2.98 |
| Slc4a7       | solute carrier family 4, sodium bicarbonate co-transporter, member 7 | Regulator of intracellular pH                                        | 2.96 |
| Loxl2        | lysyl oxidase-like 2                                                 | Putative role in connective tissue biogenesis                        | 2.94 |
| Laptm4a      | lysosomal protein transmembrane 4 $\alpha$                           | Lysosomal membrane small molecule trafficking                        | 2.91 |
| Rc3h2        | ring finger and CCCH-type zinc finger domains 2                      | Membrane associated DNA binding protein                              | 2.91 |
| Zfp91        | zinc finger protein 91                                               | Atypical E3 ubiquitin-protein ligase involved in anti-apoptosis      | 2.88 |
| Crebl2       | cAMP responsive element binding protein-like 2                       | Cell cycle regulator                                                 | 2.88 |
| Ankrd11      | ankyrin repeat domain 11                                             | Inhibitor of ligand dependent transcriptional activation             | 2.87 |
| Maf          | v-maf musculoaponeurotic fibrosarcoma oncogene homolog               | Broad transcriptional regulator, induces T-cell apoptosis            | 2.86 |
| Igf2r        | insulin-like growth factor type 2                                    | Involved in trafficking of lysosomal enzymes and T-cell activation   | 2.85 |
| Mgl1         | monoglyceride lipase                                                 | Gut epithelial lipase                                                | 2.85 |
| Tlk1         | tousled-like kinase 1                                                | Nuclear signalling kinase                                            | 2.83 |
| Ubxn4        | UBX domain protein 4                                                 | Involved in endoplasmic reticulum-associated protein degradation     | 2.83 |
| LOC312273    | trypsin V-A                                                          | Putative digestive protease                                          | 2.82 |
| Dhx36        | DEAH (Asp-Glu-Ala-His) box polypeptide 36                            | Involved in mRNA degradation                                         | 2.82 |
| Tpr          | translocated promoter region                                         | Involved in nuclear protein import                                   | 2.82 |
| Xrn2         | 5'-3' exoribonuclease 2                                              | RNase, unknown function                                              | 2.81 |
| Tns1         | tensin1                                                              | Focal adhesion component involved in ECM/cytoskeletal interaction    | 2.80 |
| Creg1        | cellular repressor of E1A-stimulated genes 1                         | Interacts with Igf2r to promote cell growth                          | 2.79 |
| Mga          | MAX gene associated                                                  | Regulator of cell growth and apoptosis                               | 2.79 |
| Stat3        | signal transducer and activator of transcription 3                   | Transcription factor mediating cytokine receptor signalling pathways | 2.77 |
| Rbm9         | RNA binding motif protein 9                                          | Regulates splicing of tissue specific exons                          | 2.74 |

|              |                                                                        |                                                                           |      |
|--------------|------------------------------------------------------------------------|---------------------------------------------------------------------------|------|
| Snrp70       | small nuclear ribonucleoprotein 70                                     | Regulator of pre-mRNA splicing                                            | 2.72 |
| Slc44a1      | solute carrier family 44, member 1                                     | Choline transporter involved in membrane synthesis                        | 2.71 |
| Dag1         | dystroglycan 1 (dystrophin-associated glycoprotein 1)                  | Extracellular matrix receptor                                             | 2.71 |
| Ubn1         | ubiquitin 1                                                            | Regulator of cell death                                                   | 2.69 |
| Eif4g1       | eukaryotic translation initiation factor 4γ 1                          | Involved in mRNA recruitment to ribosome                                  | 2.69 |
| Gcap14       | granule cell antiserum positive 14                                     | Unknown function                                                          | 2.68 |
| Mobk11a      | MOB1, Mps One Binder kinase activator-like 1A                          | Regulator of cell growth and apoptosis                                    | 2.68 |
| Arhgef12     | Rho guanine nucleotide exchange factor (GEF) 12                        | Regulator of RhoA GTPase activity                                         | 2.68 |
| Reg3b        | regenerating islet-derived 3β                                          | Antimicrobial peptide with C-type lectin domain                           | 2.63 |
| Kcnma1       | calcium-activated channel, subfamily Ma                                | Calcium ion activated potassium channel                                   | 2.63 |
| Cbl          | Cas-Br-M ecotropic retroviral transforming sequence                    | Involved in signal transduction in hematopoietic cells                    | 2.62 |
| Rnd3         | Rho family GTPase 3                                                    | Regulator of actin cytoskeletal organization                              | 2.61 |
| Sox4         | SRY-box 4                                                              | Transcriptional activator involved in development                         | 2.61 |
| Pik3r1       | phosphoinositide-3-kinase, regulatory subunit 1α                       | Adaptor mediating association of activated kinases to the plasma membrane | 2.60 |
| Hoxb6        | homeobox B6                                                            | Transcriptional regulator                                                 | 2.58 |
| Bend7        | BEN domain containing 7                                                | Unknown                                                                   | 2.57 |
| Arhgap5      | Rho GTPase activating protein 5                                        | Regulator of actin cytoskeletal organization                              | 2.56 |
| Eml4         | echinoderm microtubule associated protein like 4                       | Putative role in microtubule assembly dynamics                            | 2.56 |
| Ralgs2       | Ral GEF with PH domain and SH3 binding motif 2                         | Putative role in cytoskeletal organization                                | 2.55 |
| Falz         | fetal Alzheimer antigen                                                | Histone binding component of nucleosome-remodelling factor                | 2.55 |
| Il6st        | interleukin 6 signal transducer                                        | Intracellular transducer of cytokine signalling                           | 2.55 |
| Otub1        | OTU domain, ubiquitin aldehyde binding 1                               | Ubiquitin hydrolase regulating T-cell energy                              | 2.54 |
| Topbp1       | topoisomerase (DNA) II binding protein 1                               | Regulator of DNA damage response                                          | 2.54 |
| Slc4a4       | solute carrier family 4 (anion exchanger), member 4                    | Regulator of intracellular pH                                             | 2.54 |
| Thoc2        | THO complex 2                                                          | Involved in mRNA export                                                   | 2.53 |
| Hsp90ab1     | heat shock protein 90kDa α (cytosolic), class B member 1               | Molecular chaperone involved in cellular stress response                  | 2.52 |
| Itgb3        | integrin β3                                                            | Mediates cellular adhesion to ECM                                         | 2.52 |
| Rps6ka5      | ribosomal protein S6 kinase, polypeptide 5                             | Kinase required for activation of stress-induced transcription factors    | 2.51 |
| Thra         | thyroid hormone receptor α                                             | Nuclear hormone receptor                                                  | 2.51 |
| Cear1        | cell division cycle and apoptosis regulator 1                          | Regulator of cellular proliferation                                       | 2.51 |
| Zdhhc20      | zinc finger, DHHC-type containing 20                                   | Unknown                                                                   | 2.50 |
| Clcn5        | chloride channel 5, transcript variant 6                               | Acidification of the endosomal lumen                                      | 2.50 |
| Cisd2        | CDGSH iron sulfur domain 2                                             | Regulator of autophagy                                                    | 2.50 |
| Lcor1        | ligand dependent nuclear receptor co-repressor-like                    | Transcriptional regulator                                                 | 2.49 |
| Cend2        | cyclin D2                                                              | Cell cycle regulator                                                      | 2.48 |
| LOC100363275 | G protein-coupled receptor 124                                         | Unknown                                                                   | 2.48 |
| Itsn2        | intersectin 2                                                          | Involved in T-cell receptor endocytosis                                   | 2.46 |
| Samd8        | sterile alpha motif domain containing 8                                | Unknown                                                                   | 2.46 |
| Ubn2         | ubiquitin 2                                                            | Regulator of cell death                                                   | 2.46 |
| Bmpr2        | bone morphogenetic protein receptor, type II (serine/threonine kinase) | Involved in calcium regulation                                            | 2.45 |
| Sf3b2        | splicing factor 3b, subunit 2                                          | Subunit of splicing factor SF3B                                           | 2.44 |
| LOC681371    | hypothetical protein LOC681371                                         | Unknown function                                                          | 2.44 |

|           |                                                                                                     |                                                                                 |      |
|-----------|-----------------------------------------------------------------------------------------------------|---------------------------------------------------------------------------------|------|
| Narg1     | NMDA receptor regulated 1                                                                           | Acetyltransferase involved in hematopoietic and neuronal development            | 2.44 |
| Strn3     | striatin, calmodulin binding protein 3                                                              | Signalling or scaffolding protein involved in modulating calmodulin activity    | 2.44 |
| Pa2g4     | proliferation-associated 2G4                                                                        | Regulator of cell proliferation                                                 | 2.44 |
| Srm2      | serine/arginine repetitive matrix 2                                                                 | Involved in pre-mRNA splicing                                                   | 2.42 |
| Fermt2    | fermitin family homolog 2                                                                           | Participates in actin organization and cytoskeletal-ECM adhesion                | 2.41 |
| Chd1      | chromodomain helicase DNA binding protein 1                                                         | Chromatin remodelling                                                           | 2.40 |
| Tcf4      | transcription factor 4                                                                              | Enhancer of immunoglobulin expression                                           | 2.40 |
| Ankle2    | ankyrin repeat and LEM domain containing 2                                                          | Unknown function                                                                | 2.40 |
| Trio      | triple functional domain (PTPRF interacting)                                                        | Involved in cytoskeletal rearrangement                                          | 2.39 |
| Herc1     | hect (homologous to the E6-AP (UBE3A) carboxyl terminus) domain and RCC1 (CHC1)-like domain (RLD) 1 | Regulator of membrane trafficking                                               | 2.38 |
| Vdac1     | voltage-dependent anion channel 1                                                                   | Mitochondrial membrane channel involved in apoptosis                            | 2.38 |
| LOC286960 | preprotrypsinogen IV                                                                                | Trypsin-like serine protease                                                    | 2.38 |
| Hectd1    | HECT domain containing 1                                                                            | Ubiquitin-protein ligase                                                        | 2.38 |
| Rbm25     | RNA binding motif protein 25                                                                        | Splicing regulator involved in apoptosis                                        | 2.37 |
| Clk1      | CDC-like kinase 1                                                                                   | Putative regulator of RNA splicing                                              | 2.37 |
| Nfix      | nuclear factor I/X (CCAAT-binding transcription factor)                                             | Transcriptional activator                                                       | 2.36 |
| Wasl      | Wiskott-Aldrich syndrome-like                                                                       | Regulator of actin polymerization                                               | 2.36 |
| Ash1l     | ash1 (absent, small, or homeotic)-like                                                              | Histone methyltransferase                                                       | 2.36 |
| Traf6     | Tnf receptor-associated factor 6                                                                    | Ubiquitin ligase responsible for activating NFκB after IL-1 receptor signalling | 2.36 |
| Marcks    | myristoylated alanine rich protein kinase C substrate                                               | F-actin cross-linker                                                            | 2.36 |
| Rps6ka1   | ribosomal protein S6 kinase polypeptide 1                                                           | Mediator of stress-induced transcriptional activation                           | 2.35 |
| RT1-CE12  | RT1 class I, locus CE12                                                                             | Antigen presentation                                                            | 2.35 |
| Cpd       | carboxypeptidase D                                                                                  | Regulatory peptidase involved in NO synthesis during inflammation               | 2.35 |
| Wbp4      | WW domain binding protein 4 (formin binding protein 21)                                             | Promotes pre-mRNA splicing                                                      | 2.34 |
| LOC685707 | similar to neuron navigator 1                                                                       | Similar to protein regulating neuronal development                              | 2.34 |
| Nktr      | natural killer tumor recognition protein                                                            | NK-cell receptor                                                                | 2.33 |
| U2af1     | U2 small nuclear ribonucleoprotein auxiliary factor                                                 | Involved in mRNA splicing                                                       | 2.32 |
| Ptch1     | patched 1                                                                                           | Hedgehog gene receptor                                                          | 2.32 |
| Pgap2     | post-GPI attachment to proteins 2                                                                   | Involved in anchoring proteins to the plasma membrane                           | 2.31 |
| Zc3h11a   | zinc finger CCCH-type containing 11A                                                                | Unknown function                                                                | 2.31 |
| Raph1     | Ras association (RalGDS/AF-6) and pleckstrin homology domains 1                                     | Negatively regulates cell adhesion                                              | 2.31 |
| Mpp6      | membrane protein, palmitoylated 6 (MAGUK p55 subfamily member 6)                                    | Regulator of membrane receptor clustering                                       | 2.30 |
| Nr2f2     | nuclear receptor subfamily 2, group F, member 2                                                     | Steroid thyroid hormone receptor                                                | 2.29 |
| Pkp4      | plakophilin 4                                                                                       | Regulator of cadherin function                                                  | 2.29 |
| Id3       | inhibitor of DNA binding 3                                                                          | Inhibitor of transcription factor DNA binding                                   | 2.29 |
| Zdhc21    | zinc finger, DHHC domain containing 21                                                              | Unknown function                                                                | 2.29 |
| Ppp1r12a  | protein phosphatase 1, regulatory (inhibitor) subunit 12A                                           | Regulates myosin phosphatase activity                                           | 2.28 |
| Pafah1b1  | platelet-activating factor acetylhydrolase, isoform 1b, subunit 1                                   | Required for proper activation of Rho GTPases and actin polymerization          | 2.28 |
| Rbm5      | RNA binding motif protein 5                                                                         | Component of the spliceosome A complex                                          | 2.28 |
| Lin7      | lin-7 homolog C                                                                                     | Involved in maintaining cellular polarity                                       | 2.28 |
| Trim39    | tripartite motif containing 39                                                                      | Inhibits proteosomal degradation of pro-apoptotic factors                       | 2.27 |



|           |                                                                                        |                                                                                            |      |
|-----------|----------------------------------------------------------------------------------------|--------------------------------------------------------------------------------------------|------|
| Brd8      | bromodomain containing 8                                                               | Co-activator of nuclear hormone receptors                                                  | 2.27 |
| Ap4e1     | adapter-related protein complex 4 subunit $\epsilon$ -1                                | Involved in targeting to the endosomal/lysosomal system                                    | 2.27 |
| Lrrc8a    | leucine rich repeat containing 8 family, member A                                      | Involved in promoting B-cell maturation                                                    | 2.27 |
| Zfp106    | zinc finger protein 106                                                                | Unknown function                                                                           | 2.27 |
| Adipor2   | adiponectin receptor 2                                                                 | Involved in lipid metabolic regulation                                                     | 2.26 |
| Fam126b   | family with sequence similarity 126                                                    | Unknown function                                                                           | 2.26 |
| Add3      | adducin 3 $\gamma$                                                                     | Calmodulin binding promoter of actin-spectrin network assembly                             | 2.26 |
| Adrbk2    | adrenergic receptor kinase $\beta$ 2                                                   | Regulator of receptor function                                                             | 2.26 |
| Cdh22     | cadherin 22                                                                            | Calcium dependent cell adhesion protein                                                    | 2.26 |
| Alox15    | arachidonate 15-lipoxygenase                                                           | involved in the production and metabolism of fatty acid hydroperoxidases                   | 2.25 |
| LOC498544 | hypothetical protein LOC498544                                                         | Unknown function                                                                           | 2.25 |
| Rcor1     | REST corepressor 1                                                                     | Chromatin remodelling                                                                      | 2.24 |
| Mef2a     | myocyte enhancer factor 2a                                                             | Activator of numerous growth factor and stress-induced genes                               | 2.23 |
| Dnmt3a    | DNA (cytosine-5-)-methyltransferase 3 $\alpha$                                         | DNA methylation                                                                            | 2.23 |
| Vezf1     | vascular endothelial zinc finger 1                                                     | Regulation of IL-3 expression                                                              | 2.23 |
| Eif5      | eukaryotic translation initiation factor 5                                             | Initiator of protein synthesis                                                             | 2.22 |
| Pip5k2a   | phosphatidylinositol-5-phosphate 4-kinase, type II $\alpha$                            | Involved in the regulation of secretion, cell proliferation, differentiation, and motility | 2.22 |
| Gatad2b   | GATA zinc finger domain containing 2B                                                  | Transcriptional repressor                                                                  | 2.21 |
| Ctdspl    | CTD (carboxy-terminal domain, RNA polymerase II, polypeptide A) small phosphatase-like | Negative regulator of transcription                                                        | 2.20 |
| Rnf6      | ring finger protein (C3H2C3 type) 6                                                    | Ubiquitin-protein ligase                                                                   | 2.20 |
| Msi2      | Musashi homolog 2                                                                      | RNA-binding protein regulating cellular proliferation                                      | 2.20 |
| Mxd1      | MAX dimerization protein 1                                                             | Regulator of cellular proliferation and apoptosis                                          | 2.19 |
| Arl4d     | ADP-ribosylation factor-like 4D                                                        | Involved in intracellular membrane trafficking                                             | 2.18 |
| Krt15     | keratin 15                                                                             | Responsible for the structural integrity of epithelial cells                               | 2.18 |
| Mll5      | myeloid/lymphoid or mixed-lineage leukemia 5 (trithorax homolog)                       | Histone methyltransferase                                                                  | 2.17 |
| Rbm27     | RNA binding motif protein 27                                                           | Unknown function                                                                           | 2.17 |
| Ptprs     | protein tyrosine phosphatase, receptor type, S                                         | Signalling protein involved in development                                                 | 2.17 |
| Entpd5    | ectonucleoside triphosphate diphosphohydrolase 5                                       | Regulator of ATP usage                                                                     | 2.16 |
| Eif4a1    | eukaryotic translation initiation factor 4A1                                           | RNA-helicase allowing mRNA-ribosome interaction                                            | 2.15 |
| Phc3      | polyhomeotic-like 3                                                                    | Involved in transcriptional repression                                                     | 2.15 |
| Frg1      | FSHD region gene 1                                                                     | Involved in processing pre-rRNA                                                            | 2.15 |
| Eif5b     | eukaryotic translation initiation factor 5B                                            | Promotes binding of methionine-tRNA to ribosome                                            | 2.15 |
| Hmox1     | heme oxygenase (decycling) 1                                                           | Essential enzyme in heme metabolism                                                        | 2.14 |
| Trove2    | TROVE domain family, member 2                                                          | Regulator of Y-RNAs                                                                        | 2.13 |
| Sox11     | SRY-box containing gene 11                                                             | Developmental regulator                                                                    | 2.13 |
| Arid4b    | AT rich interactive domain 4B (Rbp1 like)                                              | Transcriptional repressor                                                                  | 2.12 |
| Mphosph8  | M-phase phosphoprotein 8                                                               | Involved in cell-cycle                                                                     | 2.12 |
| LOC688495 | hypothetical protein LOC688495                                                         | Unknown function                                                                           | 2.11 |
| Rgs4      | regulator of G-protein signalling 4                                                    | Negative regulator of G-protein signaling                                                  | 2.11 |
| Meg3      | maternally expressed 3                                                                 | Regulator of cell proliferation                                                            | 2.11 |
| Rbm39     | RNA binding motif protein 39                                                           | Involved in mRNA splicing                                                                  | 2.11 |
| Trak2     | trafficking protein, kinesin binding 2                                                 | Regulator of endosome to lysosome trafficking                                              | 2.10 |

|          |                                                                          |                                                                     |      |
|----------|--------------------------------------------------------------------------|---------------------------------------------------------------------|------|
| Ahi1     | Abelson helper integration site 1                                        | Involved in neuronal development                                    | 2.10 |
| Akap13   | A kinase (PRKA) anchor protein 13                                        | Anchors cAMP-dependent kinase                                       | 2.10 |
| Wdr37    | WD repeat domain 37                                                      | Regulator of signal transduction and apoptosis                      | 2.09 |
| Lgr4     | leucine-rich repeat containing G protein-coupled receptor 4              | Orphan receptor                                                     | 2.09 |
| C-myb    | Myb proto-oncogene                                                       | Regulates differentiation of hematopoietic cells                    | 2.09 |
| Sfrs11   | splicing factor, arginine/serine-rich 11                                 | Involved in pre-mRNA splicing                                       | 2.08 |
| Rdx      | radixin                                                                  | Binds barbed ends of actin filaments to cell membrane               | 2.07 |
| Stk25    | serine/threonine kinase 25 (STE20 homolog)                               | Stress-activated kinase regulating protein export and cell adhesion | 2.06 |
| Rhoj     | ras homolog gene family, member J                                        | Regulates cell morphology via increased F-actin formation           | 2.06 |
| Rod1     | ROD1 regulator of differentiation 1                                      | Regulator of cell differentiation                                   | 2.06 |
| Ppap2b   | phosphatidic acid phosphatase type 2B                                    | Involved in cell adhesion and cell-cell interactions                | 2.06 |
| Tsc22d4  | TSC22 domain family, member 4                                            | Transcriptional repressor                                           | 2.05 |
| Argl1    | arginine and glutamate rich 1                                            | Unknown function                                                    | 2.05 |
| Arid3a   | AT rich interactive domain 3A (Bright like)                              | Transcription factor involved in B-cell differentiation             | 2.05 |
| Rad54l2  | Rad54 like 2                                                             | DNA helicase                                                        | 2.04 |
| Ppargc1b | peroxisome proliferator-activated receptor gamma, co-activator 1 $\beta$ | Involved in fat oxidation and non-oxidative glucose metabolism      | 2.04 |
| Scn7a    | sodium channel, voltage-gated, type VII $\alpha$                         | Mediates sodium ion permeability of membranes                       | 2.04 |
| Brd4     | bromodomain containing 4                                                 | Chromatin remodelling                                               | 2.04 |
| Fnip2    | folliculin interacting protein 2                                         | Signal transducer of pro-apoptotic factors                          | 2.04 |
| Wbp4     | WW domain binding protein 4 (formin binding protein 21)                  | Involved in pre-mRNA splicing                                       | 2.04 |
| Esf1     | ESF1, nucleolar pre-rRNA processing protein, homolog                     | Transcriptional regulator                                           | 2.04 |
| Zc3h12c  | zinc finger CCCH type containing 12C                                     | Putative RNase                                                      | 2.04 |
| Luc7l2   | Luc7-like 2                                                              | Unknown function                                                    | 2.03 |
| Eef1a1   | eukaryotic translation elongation factor 1 $\alpha$ 1                    | Promoter of protein biosynthesis                                    | 2.03 |
| Rock2    | Rho-associated coiled-coil containing protein kinase 2                   | Regulates actin assembly                                            | 2.03 |
| Lsm12    | LSM12 homolog                                                            | Unknown function                                                    | 2.02 |
| Nole1    | nucleolar and coiled-body phosphoprotein 1                               | Involved in RNA polymerase I catalysed transcription                | 2.02 |
| Safb     | scaffold attachment factor B                                             | Anchor for RNA polymerase II transcriptomal complex                 | 2.02 |
| Chka     | choline kinase $\alpha$                                                  | Involved in phospholipid biosynthesis                               | 2.01 |
| Polr3k   | polymerase (RNA) III (DNA directed) polypeptide K                        | RNA polymerase III component                                        | 2.01 |
| Sms      | spermine synthase                                                        | Involved in polyamine metabolism                                    | 2.01 |
| Axin2    | axin 2                                                                   | Regulates Wnt signalling by interaction with $\beta$ -catenin       | 2.00 |
| Fatp4    | fatty acid transport protein 4                                           | Transport of long chain fatty acids                                 | 2.00 |
| Trps1    | trichorhinophalangeal syndrome I homolog                                 | Transcriptional regulator of columnar cell differentiation          | 2.00 |

**Table S3. Genes down-regulated twofold or greater in the neonatal rat GI tract 12 h after feeding *E. coli* A192PP to P2 pups**

| Gene symbol  | Description                                           | Function                                           | Mean-fold change |
|--------------|-------------------------------------------------------|----------------------------------------------------|------------------|
| Tff2         | trefoil factor 2                                      | Defence of the mucosal barrier                     | -24.63           |
| Mgam         | Maltase-glucoamylase, intestinal                      | Brush border hydrolase                             | -5.49            |
| RGD:727924   | rRNA promoter binding protein                         | Regulator of cell proliferation                    | -4.33            |
| Ins2         | insulin 2                                             | Hormone regulating carbohydrate and fat metabolism | -3.97            |
| RT1-A3       | RT1 class I, locus A3                                 | Antigen presentation                               | -3.11            |
| RT1-CE15     | RT1 class I, locus CE15                               | Antigen presentation                               | -2.86            |
| Wtap         | Wilms tumor 1 associated protein                      | Transcriptional and post-transcriptional regulator | -2.65            |
| Senp5        | Sumo1/sentrin/SMT3 specific peptidase 5               | Protease involved in cell division                 | -2.65            |
| Ins1         | insulin 1                                             | Hormone regulating carbohydrate and fat metabolism | -2.64            |
| Mcpt3        | mast cell peptidase 3                                 | Serine endopeptidase                               | -2.62            |
| Ubd          | ubiquitin D                                           | Targeting for proteosomal degradation              | -2.48            |
| RT1-Db1      | RT1 class II, locus Db1                               | Antigen presentation                               | -2.46            |
| Pbx1         | pre-B-cell leukemia transcription factor              | Transcriptional regulator                          | -2.36            |
| Pim1         | pim-1 oncogene                                        | Signalling kinase activity                         | -2.35            |
| Dcaf12       | DDB1 and CUL4 associated factor 12                    | Regulation of ligase activity                      | -2.34            |
| Mcpt4        | mast cell protease 4                                  | Serine endopeptidase                               | -2.30            |
| LOC100362483 | H2-GS14-2 antigen                                     | Regulation of antigen presentation                 | -2.29            |
| Birc6        | baculoviral IAP repeat containing 6                   | Regulation of apoptosis                            | -2.27            |
| ABCB10       | ATP binding cassette family                           | Membrane transporter                               | -2.26            |
| Mcpt1        | mast cell protease 1                                  | Serine endopeptidase                               | -2.26            |
| Coro1c       | coronin, actin binding protein 1C                     | Involved in cytokinesis                            | -2.23            |
| Itgav        | integrin $\alpha$ V                                   | Extracellular matrix receptor                      | -2.22            |
| Actn4        | actinin $\alpha$ 4                                    | Intracellular actin anchoring                      | -2.20            |
| Fam100b      | family with sequence similarity 100, member B         | Unknown                                            | -2.16            |
| Wwe1         | WW and C2 domain containing 1                         | Transcriptional activator                          | -2.15            |
| Gnptab       | N-acetylglucosamine-1-phosphate transferase           | Regulator of lysosomal transport                   | -2.13            |
| Nfkbil1      | Ikb family protein                                    | NF $\kappa$ B inhibitor relative                   | -2.09            |
| Slc1a3       | solute carrier family 1, member 3                     | Glutamate transporter                              | -2.05            |
| Spag9        | sperm associated antigen 9                            | Regulator of MAPK cascade                          | -2.05            |
| Larp1        | La ribonucleoprotein domain family, member 1          | RNA degradation                                    | -2.05            |
| Pga5         | pepsinogen 5, group I                                 | Digestive protease                                 | -2.04            |
| Dusp6        | dual specificity phosphatase 6                        | Regulator of MAPK cascade                          | -2.04            |
| Coa5         | cytochrome C oxidase assembly factor 5                | mitochondrial complex IV assembly                  | -2.04            |
| Amy1 ; Amy2  | amylase $\alpha$ 1A (salivary), amylase 2, pancreatic | Hydrolase                                          | -2.03            |
| Socs2        | suppressor of cytokine signalling 2                   | Regulator of cell signalling                       | -2.02            |
| Daf1         | Cd55 molecule                                         | Classical complement pathway activator             | -2.02            |

**Table S4. Genes up-regulated twofold or greater in the neonatal rat GI tract 12 h after feeding *E. coli* A192PP to P9 pups**

| Gene Symbol | Description                                                                               | Function                                                          | Mean-fold change |
|-------------|-------------------------------------------------------------------------------------------|-------------------------------------------------------------------|------------------|
| RT1-Bb      | RT1 class II, locus Bb                                                                    | Antigen presentation                                              | 11.77            |
| Ints7       | Integrator complex subunit 7                                                              | Involved in mRNA processing                                       | 5.53             |
| Defa-rs1    | defensin $\alpha$ -related sequence 1                                                     | $\alpha$ -defensin-type antimicrobial peptide                     | 5.44             |
| Cirbp       | cold inducible RNA binding protein                                                        | Positive regulator of cellular stress response                    | 5.21             |
| Pdcd4       | programmed cell death 4                                                                   | Inhibitor of protein biosynthesis                                 | 5.08             |
| Cct6a       | chaperonin containing Tcp1, subunit 6A $\xi$ 1                                            | Chaperone involved in correct actin and tubulin folding           | 4.89             |
| Sept2       | septin 2                                                                                  | Filament forming cytoskeletal GTPase                              | 4.86             |
| RT1-CE15    | RT1 class I, locus CE15                                                                   | Antigen presentation                                              | 4.45             |
| St6gal1     | ST6 beta-galactosamide $\alpha$ -2,6-sialyltransferase 1                                  | Transfers sialic acid to galactose containing receptor substrates | 4.41             |
| Clic4       | chloride intracellular channel 4                                                          | Membrane associated ion channel                                   | 4.36             |
| Tm9sf3      | transmembrane 9 superfamily member 3                                                      | Unknown function                                                  | 4.11             |
| RT1-Aw2     | RT1 class Ib, locus Aw2                                                                   | Antigen presentation                                              | 3.40             |
| Casp3       | caspase 3                                                                                 | Effector caspase mediating apoptosis                              | 3.95             |
| Caprin1     | cell cycle associated protein 1                                                           | Regulation of mRNA transport                                      | 3.95             |
| Vsig10l     | V-set and immunoglobulin domain containing 10 like                                        | Unknown function                                                  | 3.82             |
| Hnrnpa2b1   | heterogeneous nuclear ribonucleoprotein A2/B1                                             | Involved in mRNA processing                                       | 3.67             |
| Scgb1a1     | secretoglobin, family 1A, member 1 (uteroglobin)                                          | Anti-inflammatory regulator                                       | 3.63             |
| Vcl         | vinculin                                                                                  | Actin binding protein involved in cell-cell and cell-ECM adhesion | 3.60             |
| Nid1        | nidogen 1                                                                                 | Laminin-associated protein involved in cell-ECM adhesion          | 3.59             |
| Mylk        | myosin light chain kinase                                                                 | Regulator of actin-myosin interaction                             | 3.55             |
| Gatad2b     | GATA zinc finger domain containing 2B                                                     | Transcriptional repressor                                         | 3.53             |
| Hnf4a       | hepatocyte nuclear factor 4a                                                              | Transcription factor regulating development                       | 3.43             |
| Car3        | carbonic anhydrase 3                                                                      | Reversible hydration of carbon dioxide                            | 3.40             |
| Actr3       | ARP3 actin-related protein 3 homolog                                                      | ARP2/3 complex component, involved in cell motility               | 3.38             |
| Prkacb      | protein kinase, cAMP dependent, catalytic, $\beta$                                        | Mediates cAMP-dependent signalling                                | 3.38             |
| RGD1309534  | Similar to RIKEN cDNA 4931406C07                                                          | Unknown function                                                  | 3.38             |
| Foxn3       | forkhead box N3                                                                           | Transcriptional repressor responding to DNA damage                | 3.36             |
| Ssr3        | signal sequence receptor $\gamma$                                                         | Regulator of protein-ER attachment                                | 3.34             |
| Pak2        | p21 protein (Cdc42/Rac)-activated kinase 2                                                | Apoptotic regulator                                               | 3.32             |
| Cav1        | caveolin 1, caveolae protein                                                              | Co-stimulator of T-cell receptor mediated T-cell activation       | 3.30             |
| Gna11       | guanine nucleotide binding protein $\alpha$ 11                                            | Transmembrane signalling transducer                               | 3.30             |
| Mat2a       | methionine adenosyltransferase IIa                                                        | Catalyses the production of S-adenosylmethionine                  | 3.28             |
| Tgoln1      | trans-golgi network protein                                                               | Unknown function                                                  | 3.27             |
| Cav2        | caveolin 2                                                                                | Major component of plasma membrane caveolae                       | 3.17             |
| Ppm1a       | protein phosphatase 1A, magnesium dependent, $\alpha$ isoform                             | Negative regulator of cellular stress response                    | 3.16             |
| Pigt        | phosphatidylinositol glycan anchor biosynthesis, class T                                  | Involved in GPI cell surface protein anchor biosynthesis          | 3.15             |
| Golph3      | Golgi phosphoprotein 3 (coat-protein)                                                     | Regulator of Golgi trafficking                                    | 3.11             |
| Defa24      | defensin 24a                                                                              | $\alpha$ -defensin-type antimicrobial peptide                     | 3.09             |
| Hsd3b7      | hydroxy- $\delta$ -5-steroid dehydrogenase, 3 $\beta$ - and steroid $\delta$ -isomerase 7 | Involved in hormonal steroid biosynthesis                         | 3.06             |
| Canx        | calnexin                                                                                  | Molecular chaperone ensuring correct glycoprotein                 | 3.05             |

|            |                                                                              | folding                                                            |      |
|------------|------------------------------------------------------------------------------|--------------------------------------------------------------------|------|
| Crk        | v-crk sarcoma virus CT10 oncogene homolog                                    | Involved in phagocytosis of apoptotic cells                        | 3.03 |
| Il13ra1    | interleukin 13 receptor 1 $\alpha$                                           | IL-13 and IL-4 receptor                                            | 3.01 |
| Eif1a      | eukaryotic translation initiation factor 1A                                  | Promotes accurate ribosomal assembly                               | 3.01 |
| Rab5b      | RAB5B, member RAS oncogene family                                            | Involved in vesicular trafficking                                  | 3.00 |
| Lin7c      | lin-7 homolog C                                                              | Involved in maintenance of cellular polarity                       | 2.98 |
| Cbfb       | core-binding factor, $\beta$ subunit                                         | Broad transcriptional regulator                                    | 2.95 |
| Rcc2       | regulator of chromosome condensation 2                                       | Involved in cytokinesis                                            | 2.94 |
| Tmem47     | transmembrane protein 47                                                     | Unknown function                                                   | 2.94 |
| Rnfl14     | ring finger protein 114                                                      | Unknown function                                                   | 2.93 |
| Cd36       | CD36 molecule (thrombospondin receptor)                                      | Involved in cell adhesion and fatty acid transport                 | 2.93 |
| App        | amyloid $\beta$ (A4) precursor protein                                       | Involved in neuronal growth                                        | 2.91 |
| Zfp68      | zinc finger protein 68                                                       | Unknown function                                                   | 2.91 |
| LOC683399  | region containing similar to NGF-binding Ig light chain                      | Unknown function                                                   | 2.90 |
| Gbp1       | GC-rich promoter binding protein 1                                           | Transcriptional regulator                                          | 2.89 |
| Mcam       | melanoma cell adhesion molecule                                              | Involved in cell adhesion                                          | 2.88 |
| LOC683788  | similar to Fascin (Singed-like protein)                                      | Unknown function                                                   | 2.86 |
| Gga2       | Golgi associated, $\gamma$ adaptin ear containing, ARF binding protein 2     | Regulator of endosomal-lysosomal trafficking                       | 2.86 |
| Rod1       | ROD1 regulator of differentiation 1                                          | Involved in cellular differentiation                               | 2.85 |
| Stat5b     | signal transducer and activator of transcription 5B                          | IL-2 and IL-4 signal transducer                                    | 2.78 |
| Prpc       | prolylcarboxypeptidase (angiotensinase C)                                    | Lysosomal prolylcarboxypeptidase                                   | 2.78 |
| Prkci      | protein kinase Ci                                                            | Involved in formation of epithelial tight junctions                | 2.78 |
| Lbr        | lamin B receptor                                                             | Anchors laminin and heterochromatin to the nuclear membrane        | 2.77 |
| Pik3r1     | phosphoinositide-3-kinase, regulatory subunit 1 $\alpha$                     | Adaptor mediating protein-tyr kinase membrane binding              | 2.74 |
| Tmem45b    | transmembrane protein 45b                                                    | Unknown function                                                   | 2.73 |
| Txnrd1     | thioredoxin reductase 1                                                      | Involved in protection from oxidative stress                       | 2.72 |
| Atp1a1     | ATPase, Na <sup>+</sup> /K <sup>+</sup> transporting, $\alpha$ 1 polypeptide | Regulator of membrane electrochemical gradients                    | 2.72 |
| Lasp1      | LIM and SH3 protein 1                                                        | Regulator of dynamic actin formation                               | 2.72 |
| Ankle2     | ankyrin repeat and LEM domain containing 2                                   | Unknown function                                                   | 2.70 |
| Gnai3      | guanine nucleotide binding protein (G protein), $\alpha$ inhibiting 3        | Modulator of trans-membrane signalling systems                     | 2.70 |
| Rtn4       | reticulon 4                                                                  | Inhibitor of Bcl-x1 and Bcl-2 anti-apoptotic activity              | 2.70 |
| Col6a3     | procollagen, type VI $\alpha$ 3                                              | Cell binding protein                                               | 2.68 |
| Krt15      | keratin 15                                                                   | Epithelial structural integrity                                    | 2.66 |
| RGD1306148 | similar to KIAA0368                                                          | Unknown function                                                   | 2.65 |
| Picalm     | phosphatidylinositol binding clathrin assembly protein                       | Involved in clathrin coated pit formation                          | 2.65 |
| Cxcl12     | chemokine (C-X-C motif) ligand 12 (stromal cell-derived factor 1)            | T-cell and monocyte chemoattractant                                | 2.65 |
| Pank3      | pantothenate kinase 3                                                        | Regulator of CoA biosynthesis                                      | 2.65 |
| Myh11      | myosin, heavy chain 11, smooth muscle                                        | Involved in smooth muscle contraction                              | 2.64 |
| Ocln       | occludin                                                                     | Involved in formation and regulation of epithelial tight junctions | 2.64 |
| Galnt1     | N-acetylgalactosaminyltransferase 1 (GalNAc-T1)                              | Catalyses O-linked oligosaccharide formation                       | 2.64 |
| Akirin2    | akirin 2                                                                     | Downstream effector of cytokine signalling                         | 2.63 |
| Fnbp11     | formin binding protein 1-like                                                | Involved in actin reorganization during endocytosis                | 2.62 |
| Stard5     | StAR-related lipid transfer (START) domain containing 5                      | Involved in intracellular transport of sterols and other lipids    | 2.62 |

|          |                                                                           |                                                                                       |      |
|----------|---------------------------------------------------------------------------|---------------------------------------------------------------------------------------|------|
| Far1     | fatty acyl CoA reductase 1                                                | Catalyzes the reduction of saturated fatty acyl-CoA                                   | 2.62 |
| S100a6   | S100 calcium binding protein A6                                           | Calcium sensor involved in cellular differentiation                                   | 2.62 |
| Ptprs    | protein tyrosine phosphatase, receptor type, S                            | Transmembrane signalling transducer                                                   | 2.61 |
| Zyg11b   | zyg-II homolog B                                                          | E3 ubiquitin-ligase complex component                                                 | 2.61 |
| Hspa2    | heat shock protein 2 $\alpha$                                             | Stress-induced molecular chaperone                                                    | 2.61 |
| Slc5a1   | solute carrier family 5 (sodium/glucose cotransporter), member 1          | Mediates glucose/galactose uptake from intestinal lumen                               | 2.61 |
| Rbpj     | recombination signal binding protein for immunoglobulin $\kappa$ J region | Transcriptional regulator of NOTCH (cell-cell) signalling                             | 2.59 |
| Rab31    | RAB31, member RAS oncogene family                                         | Involved in vesicle and granule targeting                                             | 2.58 |
| Eif3s6ip | eukaryotic translation initiation factor 3, subunit 6 interacting protein | Initiator of protein synthesis                                                        | 2.58 |
| Smtn     | smoothelin                                                                | Stress fibre cytoskeletal component                                                   | 2.58 |
| Arl2bp   | ADP-ribosylation factor-like 2 binding protein                            | Regulator of STAT activity                                                            | 2.57 |
| Ireb2    | iron responsive element binding protein 2                                 | Regulator of ferritin/transferrin expression                                          | 2.57 |
| Nov      | nephroblastoma over-expressed gene                                        | Regulator of cell growth                                                              | 2.55 |
| Stk17b   | serine/threonine kinase 17b                                               | Positive regulator of apoptosis                                                       | 2.55 |
| Ppp2r4   | protein phosphatase 2A activator, regulatory subunit 4                    | Involved in apoptosis and negative regulation of cell growth                          | 2.55 |
| Cap1     | CD40 associated protein 1                                                 | Inhibitor of NF $\kappa$ B activation                                                 | 2.55 |
| Tmed2    | transmembrane emp24 domain trafficking protein 2                          | Involved in vesicular trafficking                                                     | 2.55 |
| Calm3    | calmodulin 3                                                              | Calcium binding regulator of inflammation, apoptosis and muscle contraction           | 2.54 |
| Fstl1    | follistatin-like 1                                                        | Involved in cellular differentiation                                                  | 2.53 |
| Hoxb13   | homeo box B13                                                             | Transcription factor regulating development                                           | 2.53 |
| Actr2    | ARP2 actin-related protein 2 homolog                                      | Involved in actin polymerization                                                      | 2.53 |
| Id3      | inhibitor of DNA binding 3                                                | Regulator of transcription factor function                                            | 2.53 |
| Xiap     | X-linked inhibitor of apoptosis                                           | Apoptotic suppressor                                                                  | 2.52 |
| Efna1    | ephrin A1                                                                 | Regulator of angiogenesis                                                             | 2.52 |
| Scamp2   | secretory carrier membrane protein 2                                      | Involved in post-Golgi trafficking to the surface membrane                            | 2.52 |
| Ctnnb1   | catenin (cadherin associated protein) 1 $\beta$                           | Structural component of adherent junctions, and regulator of Wnt responsive genes     | 2.51 |
| Casp2    | caspase 2                                                                 | Initiator caspase mediating apoptosis                                                 | 2.51 |
| Jak2     | Janus kinase 2                                                            | Cytokine receptor signal transducer                                                   | 2.51 |
| Myh9     | myosin, heavy chain 9, non-muscle                                         | Involved in cytokinesis                                                               | 2.50 |
| Gng2     | guanine nucleotide binding protein (G protein) 2 $\gamma$                 | Modulator of trans-membrane signalling systems                                        | 2.50 |
| Cdx1     | caudal type homeo box 1                                                   | Regulator of enterocyte differentiation                                               | 2.50 |
| Plekhb2  | pleckstrin homology domain containing, family B (evectins) member 2       | Unknown function                                                                      | 2.50 |
| Ddx3x    | DEAD (Asp-Glu-Ala-Asp) box polypeptide 3, X-linked                        | Helicase involved in interferon response                                              | 2.49 |
| Rnf6     | ring finger protein (C3H2C3 type) 6                                       | Ubiquitin-protein ligase                                                              | 2.49 |
| Ap3d1    | adaptor-related protein complex 3 1 $\Delta$ subunit                      | Involved in intracellular granule trafficking                                         | 2.47 |
| Elovl5   | ELOVL family member 5, elongation of long chain fatty acids               | Involved in elongation of long-chain fatty acids                                      | 2.47 |
| Rab5a    | RAB5A, member RAS oncogene family                                         | Promotes membrane-endosomal fusion                                                    | 2.47 |
| Asah1    | N-acylsphingosine amidohydrolase (acid ceramidase) 1                      | Hydrolyzes the sphingolipid ceramide to sphingosine (signalling lipid) and fatty acid | 2.46 |
| Kitlg    | KIT ligand                                                                | Stimulates proliferation of Mast cells                                                | 2.46 |
| Arpc2    | actin related protein 2/3 complex, subunit 2                              | Actin binding component of Arp2/3 complex                                             | 2.46 |
| Hsph1    | heat shock 105kDa/110kDa protein 1                                        | Prevents aggregation of denatured proteins during cellular stress                     | 2.46 |
| Tle4     | transducin-like enhancer of split 4 (E(sp1) homolog                       | Transcriptional co-repressor                                                          | 2.46 |

|              |                                                                                 |                                                                            |      |
|--------------|---------------------------------------------------------------------------------|----------------------------------------------------------------------------|------|
| Cdc42se2     | CDC42 small effector 2                                                          | Involved in actin organization during phagocytosis                         | 2.46 |
| Eif2s3x      | eukaryotic translation initiation factor 2, subunit 3, structural gene X-linked | Involved in protein biosynthesis                                           | 2.46 |
| Pfkm         | phosphofructokinase, muscle                                                     | Regulator of glycolysis                                                    | 2.45 |
| Dck          | deoxycytidine kinase                                                            | Phosphorylates deoxynucleotides                                            | 2.45 |
| Csnk1a1      | casein kinase 1 1 $\alpha$                                                      | Participates in Wnt signalling                                             | 2.44 |
| Nedd4        | neural precursor cell expressed, developmentally down-regulated 4               | Ubiquitin-protein ligase                                                   | 2.44 |
| Slco2b1      | solute carrier organic anion transporter family, member 2b1                     | Organic ion uptake                                                         | 2.44 |
| Prss35       | Protease, serine, 35                                                            | Unknown function                                                           | 2.43 |
| Slc31a1      | solute carrier family 31 (copper transporters), member 1                        | Copper uptake                                                              | 2.43 |
| Adam10       | ADAM metallopeptidase domain 10                                                 | Cleaves membrane bound TNF-alpha precursor to its mature form              | 2.43 |
| Cdkn2b       | cyclin-dependent kinase inhibitor 2B (p15, inhibits CDK4)                       | Effector of TGF-beta induced cell-cycle arrest                             | 2.42 |
| Sptlc1       | serine palmitoyltransferase, long chain base subunit 1                          | Key enzyme in sphingolipid synthesis                                       | 2.42 |
| Rnf4         | ring finger protein 4                                                           | Ubiquitin-protein ligase                                                   | 2.42 |
| Cacybp       | calcyclin binding protein                                                       | Involved in calcium-dependent ubiquitination                               | 2.42 |
| Tmprss8      | transmembrane protease, serine 8 (intestinal)                                   | Unknown function                                                           | 2.41 |
| Pat1         | protein associated with topoisomerase II homolog 1                              | Involved in RNA degradation                                                | 2.41 |
| Sesn3        | sestrin 3                                                                       | Involved in cellular stress response                                       | 2.41 |
| Cfh          | complement factor H                                                             | Regulator of complement activation and microbial specificity               | 2.40 |
| Tpm1         | tropomyosin 1 $\alpha$                                                          | Regulator of actin mechanics                                               | 2.40 |
| Tspan2       | tetraspanin 2                                                                   | Mediator of trans-membrane signalling systems                              | 2.40 |
| Ahcy11       | adenosylhomocysteinase-like 1                                                   | Unknown function                                                           | 2.40 |
| Tgfr2        | transforming growth factor $\beta$ receptor II                                  | Receptor inducing apoptosis and negatively regulating phagocyte activation | 2.40 |
| Scarf2       | scavenger receptor class F, member 2                                            | Involved in cell adhesion                                                  | 2.39 |
| Ipo5         | importin 5                                                                      | Involved in nuclear protein import                                         | 2.39 |
| Sept7        | septin 7                                                                        | Involved in actin cytoskeletal organization                                | 2.39 |
| LOC100363366 | amyloid $\beta$ (A4) precursor-like protein 2-like                              | Unknown function, interacts with MHC class I molecules                     | 2.38 |
| Dazap2       | DAZ associated protein 2                                                        | Involved in TGF-beta signalling and stress granule formation               | 2.38 |
| Rbm9         | RNA binding motif protein 9                                                     | Regulator of alternative exon splicing                                     | 2.38 |
| Drg1         | developmentally regulated GTP binding protein 1                                 | May play a role in cell proliferation, differentiation and death           | 2.38 |
| Slc30a9      | solute carrier family 30 (zinc transporter), member 9                           | Involved in activation of Wnt responsive genes                             | 2.38 |
| Pfn2         | profilin 2                                                                      | Regulator of actin polymerization                                          | 2.38 |
| Cebpa        | CCAAT/enhancer binding protein (C/EBP), alpha                                   | Transcriptional regulator                                                  | 2.38 |
| Cd44         | Cd44 molecule                                                                   | Hyaluronic acid (ECM) receptor, involved in lymphocyte activation          | 2.37 |
| Efnb1        | ephrin B1                                                                       | Involved in cell adhesion                                                  | 2.37 |
| Klc1         | kinesin light chain 1                                                           | Involved in organelle transport                                            | 2.36 |
| Kctd12       | potassium channel tetramerisation domain containing 12                          | GABA-B receptor subunit                                                    | 2.36 |
| Nolc1        | nucleolar and coiled-body phosphoprotein 1                                      | Involved in RNA polymerase I transcription                                 | 2.36 |
| Pgrmc2       | progesterone receptor membrane component 2                                      | Putative steroid receptor                                                  | 2.36 |
| Vezf1        | vascular endothelial zinc finger 1                                              | Transcription factor regulating cell differentiation                       | 2.36 |
| Reep6        | receptor accessory protein 6                                                    | Unknown function                                                           | 2.35 |
| Atp2b4       | ATPase, Ca <sup>++</sup> transporting, plasma membrane 4                        | Regulator of intracellular calcium homeostatis                             | 2.35 |

|            |                                                                           |                                                                                    |      |
|------------|---------------------------------------------------------------------------|------------------------------------------------------------------------------------|------|
| Lgr4       | leucine-rich repeat-containing G protein-coupled receptor 4               | Orphan receptor                                                                    | 2.35 |
| Pdlim7     | PDZ and LIM domain 7                                                      | Involved in actin cytoskeletal organization                                        | 2.35 |
| Bid        | BH3 interacting domain death agonist                                      | Pro-apoptotic mediator inducing cytochrome c release and inhibiting Bcl-2 activity | 2.34 |
| Soat1      | sterol O-acyltransferase 1                                                | Involved in lipoprotein assembly and cholesterol absorption                        | 2.34 |
| Gtf2h1     | general transcription factor IIH, polypeptide 1                           | Involved in nucleotide excision repair during transcription                        | 2.34 |
| Mbnl2      | muscleblind-like 2                                                        | Mediates pre-mRNA splicing regulation                                              | 2.34 |
| Sesn1      | sestrin 1                                                                 | Involved in the reduction of peroxiredoxins                                        | 2.34 |
| Prkar2a    | protein kinase, cAMP dependent regulatory, type II $\alpha$               | Involved in membrane association of MAP2 kinase                                    | 2.33 |
| Atp2a3     | ATPase, Ca <sup>++</sup> transporting, ubiquitous                         | Transports calcium from the cytosol to the endoplasmic reticulum                   | 2.32 |
| Nfyc       | nuclear transcription factor-Y $\gamma$                                   | Regulator of transcription at CCAAT enhancer motifs                                | 2.31 |
| Pkn2       | protein kinase N2                                                         | Inhibits Akt induced anti-apoptotic activity                                       | 2.31 |
| Pi4k2b     | phosphatidylinositol 4-kinase type 2 $\beta$                              | Regulator of vesicular trafficking                                                 | 2.31 |
| Gdi2       | GDP dissociation inhibitor 2                                              | Involved in vesicular trafficking                                                  | 2.31 |
| Larp4      | La ribonucleoprotein domain family, member 4                              | Unknown function                                                                   | 2.30 |
| Prim1      | DNA primase, p49 subunit                                                  | Component of DNA polymerase which synthesizes small Okazaki fragment primers       | 2.30 |
| Tpm4       | tropomyosin 4                                                             | Regulator of myosin-actin interactions                                             | 2.29 |
| Cdc26      | cell division cycle 26                                                    | Ubiquitin-ligase involved in cell cycle                                            | 2.29 |
| LOC501268  | nidogen 2                                                                 | Basement membrane component involved in adhesion and apoptosis                     | 2.29 |
| Tm9sf4     | transmembrane 9 superfamily protein member 4                              | Unknown function                                                                   | 2.28 |
| Tfrc       | transferrin receptor                                                      | Mediator of iron uptake                                                            | 2.27 |
| Bhlhe40    | basic helix-loop-helix family, member e40                                 | Involved in control of cell differentiation                                        | 2.27 |
| Reg3b      | regenerating islet-derived 3 $\beta$                                      | Antimicrobial peptide with C-type lectin domain                                    | 2.27 |
| Tollip     | toll interacting protein                                                  | Negative regulator of NF $\kappa$ B activation by IL-1 pathway                     | 2.26 |
| Cd3e       | CD3 molecule, epsilon polypeptide                                         | Involved in coupling antigen recognition to intracellular signalling pathways      | 2.26 |
| Rfc1       | replication factor C (activator 1) 1                                      | Involved in DNA replication and repair                                             | 2.26 |
| Arl8b      | ADP-ribosylation factor-like 8B                                           | Involved in lysosomal motility                                                     | 2.26 |
| Oaz2       | ornithine decarboxylase antizyme 2                                        | Regulator of polyamine synthesis                                                   | 2.26 |
| LOC690372  | similar to U2 (RNU2) small nuclear RNA auxiliary factor 2 isoform b       | Unknown function                                                                   | 2.26 |
| Slc9a3r1   | solute carrier family 9 (sodium/hydrogen exchanger), member 3 regulator 1 | Involved in regulating interactions between cytoskeleton and membrane proteins     | 2.25 |
| Leprot     | leptin receptor overlapping transcript                                    | Decreases cellular response to leptin hormone                                      | 2.25 |
| Med14      | mediator complex subunit 14                                               | Involved in regulation of RNA polymerase II transcription                          | 2.24 |
| Toe1       | target of EGR1, member 1 (nuclear)                                        | Positive regulator of TGF-beta expression                                          | 2.24 |
| Cd55       | Cd55 molecule                                                             | Negative regulator of the complement cascade                                       | 2.24 |
| Mgea5      | Meningioma expressed antigen 5 (hyaluronidase)                            | Glycosidase that removes O-GlcNAc from glycoproteins                               | 2.24 |
| Fytd1      | forty-two-three domain containing 1                                       | Involved in mRNA export                                                            | 2.24 |
| Pla2g10    | phospholipase A2, group X                                                 | Regulator of cellular lipid content                                                | 2.24 |
| Cebpg      | CCAAT/enhancer binding protein (C/EBP), gamma                             | Positive regulator of IL-4 expression                                              | 2.23 |
| Parva      | parvin $\alpha$                                                           | Regulator of cellular adhesion                                                     | 2.23 |
| Pmm2       | phosphomannomutase 2                                                      | Involved in glycoprotein biosynthesis                                              | 2.23 |
| Cdkn2aipnl | CDKN2A interacting protein N-terminal like                                | Unknown function                                                                   | 2.22 |
| Ndr1       | N-myc downstream regulated gene 1                                         | Involved in stress response and cell differentiation                               | 2.22 |
| Angptl2    | angiopoietin-like 2                                                       | Induces sprouting in endothelial cells                                             | 2.22 |



|           |                                                                                                       |                                                                       |       |
|-----------|-------------------------------------------------------------------------------------------------------|-----------------------------------------------------------------------|-------|
| Sox4      | SRY (sex determining region Y)-box 4                                                                  | Transcriptional activator that binds to T-cell enhancer motifs        | 2.22  |
| Arfp1     | ADP-ribosylation factor interacting protein 1                                                         | Arf1 target protein                                                   | 2.22  |
| Dlg3      | discs, large homolog 3                                                                                | Regulator of synaptic plasticity                                      | 2.22  |
| Rfk       | riboflavin kinase                                                                                     | Involved in utilization of vitamin B2                                 | 2.22  |
| Ppp3r1    | protein phosphatase 3, regulatory subunit B, $\alpha$ isoform                                         | Regulator of calmodulin stimulated protein phosphatase                | 2.21  |
| Vps4a     | vacuolar protein sorting 4 homolog A                                                                  | Involved in intracellular protein trafficking                         | 2.21  |
| RT1-A2    | RT1 class Ia, locus A2                                                                                | Antigen presentation                                                  | 2.21  |
| Map4k5    | mitogen-activated protein kinase 5                                                                    | Involved in transducing cell stress signals                           | 2.21  |
| Ppp4c     | protein phosphatase 4, catalytic subunit                                                              | Phosphatase regulating several cellular processes                     | 2.21  |
| Tra2a     | transformer 2a homolog                                                                                | Regulator of pre-mRNA splicing                                        | 2.211 |
| Galnt4    | N-acetylgalactosaminyltransferase 4                                                                   | Catalyses initial reaction in O-linked oligosaccharide biosynthesis   | 2.21  |
| Arl6ip5   | ADP-ribosylation-like factor 6 interacting protein 5                                                  | Regulates intracellular concentrations of taurine and glutamate       | 2.21  |
| Casp8     | caspase 8                                                                                             | Initiator caspase mediating apoptosis                                 | 2.20  |
| Pcsk5     | Pro-protein convertase subtilisin/kexin type 5 defective in cullin neddylation 1, domain containing 1 | Involved processing multiple pro-proteins to their mature forms       | 2.20  |
| Dcn1      | ubiquitin-protein ligase                                                                              | Ubiquitin-protein ligase                                              | 2.20  |
| Lyn       | v-src-1 Yamaguchi sarcoma viral related oncogene homolog                                              | Regulator of cytokinesis and adhesion                                 | 2.20  |
| Hdac1     | histone deacetylase 1                                                                                 | Regulator of cell-cycle and development                               | 2.20  |
| Dnajc5    | DnaJ (Hsp40) homolog, subfamily C, member 5                                                           | Involved in membrane trafficking and protein folding                  | 2.20  |
| Ghr       | growth hormone receptor                                                                               | Involved in post-natal tissue development                             | 2.20  |
| Pkia      | protein kinase (cAMP-dependent, catalytic) inhibitor $\alpha$                                         | Regulator of intracellular signalling                                 | 2.20  |
| Epas1     | endothelial PAS domain protein 1                                                                      | Involved in the induction of oxygen regulated genes                   | 2.20  |
| Elmod2    | ELMO/CED-12 domain containing 2                                                                       | Positive regulator of interferon response                             | 2.19  |
| Hpcal1    | hippocalcin-like 1                                                                                    | Involved in calcium-dependent regulation of rhodopsin phosphorylation | 2.19  |
| Ppp2r5e   | protein phosphatase 2, regulatory subunit B', epsilon isoform                                         | Negative regulator of cell growth                                     | 2.19  |
| LOC363060 | similar to RIKEN cDNA 1600029D21                                                                      | Unknown function                                                      | 2.19  |
| Kcne3     | potassium voltage-gated channel, Isk-related subfamily, gene 3                                        | Involved in epithelial electrolyte transport                          | 2.19  |
| Gsr       | glutathione reductase                                                                                 | Involved in cellular antioxidant defence                              | 2.19  |
| Csnk1d    | casein kinase 1 $\Delta$                                                                              | Participates in Wnt signalling                                        | 2.19  |
| Arpp19    | cAMP-regulated phosphoprotein 19                                                                      | Regulator of mitosis                                                  | 2.18  |
| Tubb4     | tubulin 4 $\beta$                                                                                     | Major microtubule component                                           | 2.18  |
| Smad4     | SMAD family member 4                                                                                  | Mediator of signal transduction by TGF-beta                           | 2.18  |
| Eif4g2    | eukaryotic translation initiation factor 4 2 $\gamma$                                                 | General repressor of translation                                      | 2.18  |
| Ebag9     | estrogen receptor binding site associated, antigen, 9                                                 | Caspase 3 activator involved in apoptosis                             | 2.18  |
| Aktip     | AKT interacting protein                                                                               | Regulator of apoptosis via interactions with Akt1                     | 2.17  |
| Snx11     | sorting nexin 11                                                                                      | Involved in intracellular trafficking                                 | 2.17  |
| Nsf       | N-ethylmaleimide-sensitive factor                                                                     | Involved in ER-Golgi transport                                        | 2.16  |
| Ssbp3     | single stranded DNA binding protein 3                                                                 | Regulator of collagen expression                                      | 2.16  |
| Mapk1     | mitogen activated protein kinase 1                                                                    | Extracellular signal regulated kinase                                 | 2.16  |
| Arl5a     | ADP-ribosylation factor-like 5A                                                                       | GTP-binding protein involved in development                           | 2.16  |
| Heg1      | HEG homolog 1                                                                                         | Unknown function                                                      | 2.16  |
| Shfm1     | split hand/foot malformation (ectrodactyly) type 1                                                    | Involved in ubiquitin dependent proteolysis                           | 2.16  |
| Hsd17b6   | hydroxysteroid (17- $\beta$ ) dehydrogenase 6                                                         | NAD-dependent oxidoreductase with broad substrate range               | 2.16  |

|           |                                                                   |                                                                        |      |
|-----------|-------------------------------------------------------------------|------------------------------------------------------------------------|------|
| Ankrd12   | ankyrin repeat domain 12                                          | Inhibitor of nuclear receptor transcriptional activity                 | 2.15 |
| Rhoa      | ras homolog gene family, member A                                 | Regulator of membrane-actin stress fibre signal transduction           | 2.15 |
| Gpd1      | glycerol-3-phosphate dehydrogenase 1                              | Involved in lipid biosynthesis                                         | 2.15 |
| Wdr33     | WD repeat domain 33                                               | Involved in cellular differentiation                                   | 2.15 |
| Ldlr      | low density lipoprotein receptor                                  | Mediator of LDL endocytosis                                            | 2.15 |
| Cdc16     | cell division cycle 16 homolog                                    | Regulator of cell-cycle                                                | 2.15 |
| Psen1     | presenilin 1                                                      | Increases cytoplasmic B-catenenin concentration during apoptosis       | 2.15 |
| Lamc1     | Laminin 1 $\gamma$                                                | Mediator of cellular adhesion and migration                            | 2.15 |
| Spink4    | serine peptidase inhibitor, Kazal type 4                          | Gastrointestinal protease inhibitor                                    | 2.15 |
| Isoc1     | isochorismatase domain containing 1                               | Unknown function                                                       | 2.14 |
| Frem2     | Fras1 related extracellular matrix protein 2                      | ECM protein involved in maintenance of epithelial integrity            | 2.14 |
| Map3k3    | mitogen activated protein kinase kinase kinase 3                  | Component of protein kinase signal cascade                             | 2.14 |
| Ifnar1    | interferon ( $\alpha$ , $\beta$ and $\omega$ ) receptor 1         | Mediator of type I interferon signalling                               | 2.14 |
| Ube2h     | ubiquitin-conjugating enzyme E2H                                  | Catalyses covalent attachment of ubiquitin to other proteins           | 2.14 |
| Rnf4      | ring finger protein 4                                             | Ubiquitin-protein ligase                                               | 2.14 |
| Pld1      | phospholipase D1                                                  | Involved in signal transduction and membrane trafficking               | 2.14 |
| Add1      | adducin 1 $\alpha$                                                | Calmodulin binding promoter of actin-spectrin network assembly         | 2.13 |
| Tsnax     | translin-associated factor X                                      | Nuclear targeting protein                                              | 2.13 |
| Pmp22     | peripheral myelin protein 22                                      | Major component of myelin in the peripheral nervous system             | 2.13 |
| Rab6a     | RAB6A, member RAS oncogene family                                 | Regulator of membrane traffic from the Golgi apparatus                 | 2.13 |
| Ddx21     | DEAD (Asp-Glu-Ala-Asp) box polypeptide 21                         | RNA helicase involved in ribosome synthesis and innate immunity        | 2.13 |
| Csnk1g3   | casein kinase 1 3 $\gamma$                                        | Participates in Wnt signalling                                         | 2.13 |
| Pnrc2     | proline-rich nuclear receptor co-activator 2                      | Involved in mRNA processing                                            | 2.13 |
| Eif3a     | eukaryotic translation initiation factor 3, subunit A             | Involved in protein biosynthesis                                       | 2.12 |
| Slc30a1   | solute carrier family 30 (zinc transporter), member 1             | Involved in zinc export                                                | 2.12 |
| Ddx17     | DEAD (Asp-Glu-Ala-Asp) box polypeptide 17                         | RNA helicase                                                           | 2.12 |
| LOC685179 | similar to SWI/SNF-related regulator of chromatin c2              | Unknown function                                                       | 2.12 |
| Epb4113   | erythrocyte protein band 4.1-like 3                               | Unknown function                                                       | 2.11 |
| Fam46a    | family with sequence similarity 46, member A                      | Unknown function                                                       | 2.11 |
| Dlg1      | discs, large homolog 1                                            | Involved in maintenance of cellular polarity and lymphocyte activation | 2.11 |
| Pdha1     | pyruvate dehydrogenase (lipoamide) 1 $\alpha$                     | Involved in linking glycolysis and the TCA cycle                       | 2.11 |
| Hnf4      | hepatocyte nuclear factor 4                                       | Regulator of liver, kidney and intestinal development                  | 2.11 |
| Ensa      | endosulfine $\alpha$                                              | Modulator of insulin secretion                                         | 2.11 |
| Ifnar1    | interferon ( $\alpha$ , $\beta$ and $\omega$ ) receptor 1         | Mediator of interferons alpha and beta signalling                      | 2.11 |
| Pafah1b1  | platelet-activating factor acetylhydrolase, isoform 1b, subunit 1 | Involved in several dynein and microtubule-dependent processes         | 2.11 |
| Mtpn      | myotrophin                                                        | Involved in neuronal differentiation                                   | 2.10 |
| Galnt2    | N-acetylgalactosaminyltransferase 2 (GalNAc-T2)                   | Catalyzes initial reaction in O-linked glycosylation of mucins         | 2.10 |
| Eif4h     | eukaryotic translation initiation factor 4H                       | Involved in protein biosynthesis                                       | 2.10 |
| Rbp4      | retinol binding protein 4, plasma                                 | Mediator of vitamin A (retinol) transport                              | 2.01 |
| Tcrb      | T-cell receptor beta chain                                        | Recognizes MHC bound antigens on antigen presenting cells              | 2.09 |
| Rab27a    | RAB27A, member RAS oncogene family                                | Mediates cytotoxic granule exocytosis in lymphocytes                   | 2.09 |

|           |                                                                        |                                                                              |      |
|-----------|------------------------------------------------------------------------|------------------------------------------------------------------------------|------|
| Nrp2      | neuropilin 2, transcript variant 4                                     | Involved in transmembrane signalling                                         | 2.09 |
| Klra17    | killer cell lectin-like receptor, subfamily A, member 17               | NK-cell pathogen recognition receptor                                        | 2.09 |
| Tnks2     | tankyrase, TRF1-interacting ankyrin-related ADP-ribose polymerase 2    | Inhibitor of Wnt signalling                                                  | 2.09 |
| Dnajb14   | DnaJ (Hsp40) homolog, subfamily B, member 14                           | Involved in membrane trafficking and protein folding                         | 2.09 |
| Grin1a    | glutamate receptor, ionotropic, N-methyl D-aspartate-like 1A           | Regulator of transcriptional activation                                      | 2.09 |
| Mafg      | v-maf musculoaponeurotic fibrosarcoma oncogene homolog G               | Transcriptional regulator                                                    | 2.09 |
| Snx18     | sorting nexin 18                                                       | Involved in several stages of endocytosis                                    | 2.08 |
| Sdccag3   | serologically defined colon cancer antigen 3                           | May be involved in modulation of the TNF response                            | 2.08 |
| Glipr2    | GLI pathogenesis-related 2                                             | Involved in apoptosis and macrophage differentiation                         | 2.08 |
| Sec61a1   | Sec61 1a subunit                                                       | Involved in assembly of membrane and secretory proteins                      | 2.08 |
| Slc16a1   | solute carrier family 16, member 1 (monocarboxylic acid transporter 1) | Lactate and pyruvate transporter                                             | 2.08 |
| Ak2       | adenylate kinase 2                                                     | Involved in energy metabolism and nucleotide synthesis                       | 2.08 |
| Tcea1     | transcription elongation factor A (SII) 1                              | Involved in RNA polymerase II transcription                                  | 2.07 |
| Eprs      | glutamyl-prolyl-tRNA synthetase                                        | Catalyzes the attachment of the cognate amino acid to the corresponding tRNA | 2.07 |
| Hyal3     | hyaluronoglucosaminidase 3                                             | ECM regulator                                                                | 2.07 |
| Senp5     | Sumo1/sentrin/SMT3 specific peptidase 5                                | Component of the SUMO post-translational modification pathway                | 2.07 |
| Arf6      | ADP-ribosylation factor 6                                              | Involved in vesicular trafficking and actin remodelling                      | 2.07 |
| Ubl3      | ubiquitin-like 3                                                       | Unknown function                                                             | 2.07 |
| Dsta      | dystonin transcript variant a                                          | Component of adhesion junctions                                              | 2.06 |
| Rab5b     | RAB5B, member RAS oncogene family                                      | GTPase modulating endosomal trafficking                                      | 2.06 |
| Akt1s1    | AKT1 substrate 1 (proline-rich)                                        | Regulator of cell growth                                                     | 2.06 |
| LOC686428 | similar to Emu2                                                        | Unknown function                                                             | 2.06 |
| Usf1      | upstream transcription factor 1                                        | Transcriptional regulator                                                    | 2.06 |
| Mki67ip   | Mki67 (FHA domain) interacting nucleolar phosphoprotein                | Involved in the cell-cycle                                                   | 2.06 |
| Vdac1     | voltage-dependent anion channel 1                                      | Mediator of cytochrome-c release during apoptosis                            | 2.06 |
| Akt2      | v-akt murine thymoma viral oncogene homolog 2                          | General protein kinase                                                       | 2.05 |
| Ccl2      | chemokine (C-C motif) ligand 2                                         | Recruits monocytes, T(mem)-cells and dendritic cells to site of infection    | 2.05 |
| Zdhhc3    | zinc finger, DHHC-type containing 3                                    | Regulator of cell surface stability                                          | 2.05 |
| Gtpbp4    | GTP binding protein 4                                                  | Involved in ribosomal synthesis                                              | 2.05 |
| Zdhhc17   | zinc finger, DHHC domain containing 17                                 | Involved in endocytosis                                                      | 2.05 |
| LOC363060 | similar to RIKEN cDNA 1600029D21                                       | Unknown function                                                             | 2.05 |
| LOC366300 | hypothetical LOC366300                                                 | Unknown function                                                             | 2.04 |
| Selt      | selenoprotein T                                                        | Involved in redox regulation and cell adhesion                               | 2.04 |
| Rab11b    | RAB11B, member RAS oncogene family                                     | Regulator of exo/endocytosis                                                 | 2.04 |
| Arf1      | ADP-ribosylation factor 1                                              | Involved in vesicular trafficking and actin remodelling                      | 2.04 |
| Sf3b5     | splicing factor 3b, subunit 5                                          | Spliceosome component                                                        | 2.03 |
| Cul4b     | cullin 4B                                                              | Ubiquitin-protein ligase                                                     | 2.03 |
| Nkx2-3    | NK2 transcription factor related, locus 3                              | Transcription factor; possible role in cell differentiation                  | 2.03 |
| LOC681825 | similar to Prefoldin subunit 3                                         | Unknown function                                                             | 2.02 |
| Gna12     | guanine nucleotide binding protein 12a                                 | Membrane signal transducer                                                   | 2.02 |
| Siah1a    | seven in absentia 1A                                                   | Ubiquitin-protein ligase                                                     | 2.02 |

|           |                                                                    |                                                                  |      |
|-----------|--------------------------------------------------------------------|------------------------------------------------------------------|------|
| Camk2d    | calcium/calmodulin-dependent protein kinase II delta               | Transducer of calcium/calmodulin signalling                      | 2.02 |
| Cobl      | cordon-bleu homolog                                                | May be involved in actin modulation                              | 2.02 |
| Cd3d      | CD3 molecule delta polypeptide                                     | T-cell TCR/CD3 complex component mediating signal transduction   | 2.02 |
| Cops4     | COP9 constitutive photomorphogenic homolog subunit 4 (Arabidopsis) | Regulator of several signalling pathways                         | 2.02 |
| LOC288913 | Similar to Leydig cell tumor 10 kD protein                         | Unknown function                                                 | 2.02 |
| Rcc2      | regulator of chromosome condensation 2                             | Involved in mitosis and cytokinesis                              | 2.02 |
| Mrpl52    | mitochondrial ribosomal protein L52                                | Mito-ribosomal protein component                                 | 2.01 |
| Prlr      | prolactin receptor                                                 | Hormone receptor                                                 | 2.01 |
| Jam2      | junctional adhesion molecule 2                                     | Tight junction component involved in lymphocyte homing           | 2.01 |
| Smek2     | SMEK homolog 2, suppressor of mek1                                 | Regulator of microtubule organization                            | 2.01 |
| Prpf38b   | PRP38 pre-mRNA processing factor 38 domain containing B            | May be required for pre-mRNA splicing                            | 2.01 |
| Dusp1     | dual specificity phosphatase 1                                     | Negatively regulates mitogen-associated protein kinases (MAPK's) | 2.01 |
| Marveld2  | membrane-associating domain containing 2                           | Integral tight junction component                                | 2.01 |
| Tmem20    | transmembrane protein 20                                           | Unknown function                                                 | 2.01 |
| Tbc1d1    | TBC1 domain family, member 1                                       | May regulate cell growth and differentiation                     | 2.01 |
| Gpkow     | G patch domain and KOW motifs                                      | Unknown function                                                 | 2.01 |
| Phf11     | PHD finger protein 11                                              | Regulator of Th1-type cytokine expression                        | 2.01 |
| Sema4g    | sema domain, Ig, transmembrane and short cytoplasmic domain 4G     | Axon guidance ligand                                             | 2.01 |
| Foxa2     | forkhead box A2                                                    | Transcription factor involved in development                     | 2.00 |
| Dffb      | DNA fragmentation factor, $\beta$ polypeptide                      | Pro-apoptotic caspase activated Dnase                            | 2.00 |
| Arih1     | ariadne ubiquitin-conjugating enzyme E2 binding protein homolog 1  | Ubiquitin-protein ligase                                         | 2.00 |
| Cdc42bpb  | CDC42 binding protein kinase beta (DMPK-like)                      | CDC42 effector involved in cytoskeletal organization             | 2.00 |
| Itga6     | integrin $6\alpha$                                                 | Involved in cell adhesion and cell-surface signalling            | 2.00 |

**Table S5. Genes down-regulated twofold or greater in the neonatal rat GI tract 12 h after feeding *E. coli* A192PP to P9 pups**

| Gene Symbol   | Description                                                        | Function                                                                   | Mean-fold change |
|---------------|--------------------------------------------------------------------|----------------------------------------------------------------------------|------------------|
| Nucks1        | nuclear casein kinase and cyclin-dependent kinase substrate 1      | May be involved in cell proliferation                                      | -11.81           |
| Afp           | $\alpha$ -fetoprotein                                              | Major plasma protein                                                       | -11.71           |
| Tmsb10        | thymosin 10 $\beta$                                                | Inhibitor of actin polymerization                                          | -8.62            |
| RT1-Db1       | RT1 class II, locus Db1                                            | Antigen presentation                                                       | -7.46            |
| Adfp          | Adipose differentiation related protein                            | Involved in sequestering lipids                                            | -6.33            |
| RT1-A         | RT1 class I, locus A                                               | Antigen presentation                                                       | -5.85            |
| Cav2          | caveolin 2                                                         | Involved in signal transduction                                            | -5.00            |
| Epsti1        | epithelial stromal interaction 1                                   | Unknown function                                                           | -5.00            |
| Pacsin1       | protein kinase C and casein kinase substrate in neurons 1          | May be involved in vesicle transport                                       | -4.95            |
| LOC100362483  | H2-GS14-2 antigen                                                  | RT1 homologue                                                              | -4.67            |
| Tbc1d20       | TBC1 domain family, member 20                                      | GTPase-activator for Rab family proteins                                   | -4.61            |
| LOC688090     | similar to RT1 class II, locus Bb                                  | Antigen presentation                                                       | -4.42            |
| Mfsd2         | major facilitator superfamily domain containing 2                  | May regulate cell proliferation                                            | -4.35            |
| Amy2          | amylase 2, pancreatic                                              | Involved in starch hydrolysis                                              | -4.33            |
| Lox           | lysyl oxidase                                                      | Initiator of collagen-elastic cross-linking                                | -4.22            |
| Krit1         | KRIT1, ankyrin repeat containing                                   | Involved in microtubule formation and maintenance of endothelial integrity | -3.97            |
| RGD1308772    | similar to KIAA0564 protein                                        | Unknown function                                                           | -3.89            |
| Ptpn3         | protein tyrosine phosphatase, non-receptor type 3                  | Regulator of cell adhesion                                                 | -3.88            |
| Smrce1        | SWI/SNF related regulator of chromatin e1                          | Regulator of transcription via chromatin remodelling                       | -3.66            |
| Rsu1          | Ras suppressor protein 1                                           | Suppressor of Ras mediated signalling                                      | -3.61            |
| Galnt1        | N-acetylgalactosaminyltransferase 1 (Galnt1), transcript variant 2 | Catalyzes initial reaction in O-linked glycosylation of mucins             | -3.52            |
| Tgfb2         | transforming growth factor 2 $\beta$                               | Suppressor of IL-2 mediated T-cell growth                                  | -3.51            |
| 8430427H17Rik | RIKEN cDNA 8430427H17 gene                                         | Unknown function                                                           | -3.47            |
| Ints7         | integrator complex subunit 7                                       | Involved in processing small nuclear RNA's                                 | -3.42            |
| Mtmr1         | myotubularin related protein 1                                     | May be involved in signalling                                              | -3.41            |
| Tlk2          | tousled-like kinase 2                                              | Involved in cell cycle regulation                                          | -3.41            |
| Phlda3        | pleckstrin homology-like domain, family A, member 3                | Repressor of Akt signalling                                                | -3.40            |
| Nr3c1         | nuclear receptor subfamily 3, group C, member 1                    | Regulator of trans-nuclear membrane signalling                             | -3.25            |
| Srp54a        | signal recognition particle 54a                                    | May mediate targeting to the ER                                            | -3.25            |
| Zfp191        | zinc finger protein 191                                            | Transcriptional repressor involved in development                          | -3.17            |
| Wwc1          | WW and C2 domain containing 1                                      | Regulator of proliferation and apoptosis                                   | -3.16            |
| Pim1          | proviral integration site 1                                        | Involved in cell proliferation                                             | -3.14            |
| Ass1          | argininosuccinate synthetase 1                                     | Involved in arginine biosynthesis                                          | -3.13            |
| Ahi1          | Abelson helper integration site 1                                  | Involved in neuronal development                                           | -3.11            |
| Ttc21b        | tetratricopeptide repeat domain 21B                                | Negative modulator of sonic hedgehog signal transduction                   | -3.09            |
| Zfp422        | zinc finger protein 422                                            | Transcriptional regulator                                                  | -3.09            |
| Stox2         | storkhead box 2                                                    | Involved in development                                                    | -3.07            |
| CP-2          | Cyclic Protein-2                                                   | Involved in iron transport                                                 | -3.06            |
| Tcf712        | transcription factor 7-like 2, T-cell specific, HMG-box            | Transcription factor involved in Wnt signalling                            | -3.05            |
| Eml4          | echinoderm microtubule associated protein like 4                   | May modify assembly dynamics of microtubules                               | -3.04            |

|          |                                                                      |                                                                               |       |
|----------|----------------------------------------------------------------------|-------------------------------------------------------------------------------|-------|
| Znf503   | zinc finger protein 503                                              | Transcriptional repressor                                                     | -3.03 |
| Stard3   | StAR-related lipid transfer (START) domain containing 3              | Cholesterol transporter                                                       | -2.99 |
| Dlst     | dihydropyrimidinase (E2 component of 2-oxo-glutarate complex)        | Involved in fatty acid metabolism                                             | -2.96 |
| Id4      | Inhibitor of DNA binding 4                                           | Regulator of DNA binding                                                      | -2.95 |
| Pafah1b1 | platelet-activating factor acetylhydrolase, isoform 1b, subunit 1    | Involved in cytoskeletal organization                                         | -2.95 |
| Cyfp1    | cytoplasmic FMR1 interacting protein 1                               | Mediator of translational repression                                          | -2.94 |
| Mrp194   | mitochondrial ribosomal protein L49                                  | Component of the mitochondrial ribosome                                       | -2.94 |
| Plcx2    | phosphatidylinositol-specific phospholipase C, X domain containing 2 | Involved in signal transduction                                               | -2.93 |
| Dpep1    | dipeptidase 1                                                        | Hydrolysis of dipeptides                                                      | -2.91 |
| Crim1    | Cysteine-rich transmembrane BMP regulator 1 (chordin like)           | May play a role in angiogenesis                                               | -2.89 |
| Acd      | adrenocortical dysplasia homolog                                     | Telosome component                                                            | -2.87 |
| Tmem38b  | transmembrane protein 38B                                            | Mediator of rapid intracellular calcium release                               | -2.87 |
| Gnas     | Gs $\alpha$ subunit                                                  | Involved in signal transduction                                               | -2.86 |
| Vash1    | vasohibin 1                                                          | Angiogenesis inhibitor                                                        | -2.85 |
| RT1-Ba   | RT1 class II, locus Ba                                               | Antigen presentation                                                          | -2.83 |
| Adam33   | a disintegrin and metallopeptidase domain 33 (predicted)-like        | May be involved in cell adhesion                                              | -2.82 |
| Mocs2    | molybdenum cofactor synthesis 2                                      | Involved in molybdopterin biosynthesis                                        | -2.82 |
| Tsc22d2  | TSC22 domain family, member 2                                        | Unknown function                                                              | -2.82 |
| Tmem131  | transmembrane protein 131                                            | May be involved in immune response                                            | -2.80 |
| Hnrnpa1  | heterogeneous nuclear ribonucleoprotein A1                           | Involved in pre-mRNA processing                                               | -2.78 |
| Ptpnb    | protein tyrosine phosphatase, receptor type, B                       | Regulator of angiogenesis                                                     | -2.78 |
| Tmem14a  | transmembrane protein 14A                                            | Unknown function                                                              | -2.78 |
| Thbs2    | thrombospondin 2                                                     | Adhesive glycoprotein mediating cell adhesion to ECM                          | -2.75 |
| Senp7    | SUMO1/sentrin specific peptidase 7                                   | Catalyzes the removal of SUMO protein markers                                 | -2.73 |
| Slc30a2  | solute carrier family 30 (zinc transporter), member 2                | Zinc transporter                                                              | -2.71 |
| Neu1     | sialidase 1 (lysosomal sialidase)                                    | Catalyzes the removal of sialic acids from proteins                           | -2.70 |
| Rab30    | RAB30, member RAS oncogene family                                    | Golgi-associated signalling protein                                           | -2.69 |
| Tiparp   | TCDD-inducible poly(ADP-ribose) polymerase                           | May play a role in adaptive response to chemical exposure                     | -2.69 |
| Capn7    | calpain 7                                                            | Ubiquitous calcium regulated protease                                         | -2.68 |
| Pik3r2   | phosphoinositide-3-kinase, regulatory subunit 2 $\beta$              | Adaptor mediating association of activated kinases to the plasma membrane     | -2.67 |
| Ube2cbp  | ubiquitin-conjugating enzyme E2C binding protein                     | Ubiquitin-protein ligase                                                      | -2.67 |
| Sgcb     | sarcoglycan, beta (dystrophin-associated glycoprotein)               | Involved in anchoring F-actin to the ECM                                      | -2.67 |
| Mcpt3    | mast cell peptidase 3                                                | Serine endopeptidase                                                          | -2.65 |
| Dcaf10   | DDB1 and CUL4 associated factor 10                                   | Involved in ubiquitin-protein ligation                                        | -2.65 |
| Slc30a7  | solute carrier family 30 (zinc transporter), member 7                | Regulator of zinc homeostatis                                                 | -2.65 |
| Slc20a1  | solute carrier family 20 (phosphate transporter), member 1           | Regulator of phosphate homeostatis                                            | -2.64 |
| Itgal    | integrin L $\alpha$                                                  | Intercellular adhesion molecule receptor involved in immune cell interactions | -2.62 |
| Ppp1r8   | protein phosphatase 1, regulatory (inhibitor) subunit 8              | Involved in pre-mRNA processing                                               | -2.61 |
| Hspa5    | heat shock protein 5                                                 | Involved in regulating protein folding in the ER                              | -2.60 |
| Tmem33   | transmembrane protein 33                                             | Unknown function                                                              | -2.59 |
| Eif1b    | eukaryotic translation initiation factor 1B                          | May be involved in translation                                                | -2.58 |

|              |                                                                                          |                                                          |       |
|--------------|------------------------------------------------------------------------------------------|----------------------------------------------------------|-------|
| Greb1        | gene regulated by estrogen in breast cancer                                              | Hormone-dependent growth regulator                       | -2.58 |
| Mreg         | melanoregulin                                                                            | Involved in membrane fusion                              | -2.58 |
| Anxa7        | annexin A7                                                                               | Membrane fusion promoter involved in exocytosis          | -2.57 |
| Slc34a3      | solute carrier family 34 (sodium phosphate), member 3                                    | Active phosphate importer                                | -2.56 |
| Stk24        | serine/threonine kinase 24                                                               | Involved in signal transduction                          | -2.56 |
| Gjb3         | gap junction protein, beta 3                                                             | Mediator of intercellular connexin transport             | -2.55 |
| Rnf2         | ring finger protein 2                                                                    | Ubiquitin-protein ligase                                 | -2.54 |
| Itih3        | inter- $\alpha$ -trypsin inhibitor, heavy chain 3                                        | Involved in binding hyaluronan to other ECM proteins     | -2.53 |
| Tmem178      | transmembrane protein 178                                                                | Unknown function                                         | -2.53 |
| Icmt         | isoprenylcysteine carboxyl methyltransferase                                             | Involved in targeting proteins to the membrane           | -2.51 |
| Jag1         | jagged 1                                                                                 | Notch receptor ligand and mediator of Notch signaling    | -2.49 |
| Mmp15        | matrix metalloproteinase 15                                                              | Peptidase that degrades ECM components                   | -2.48 |
| RGD1359529   | similar to chromosome 1 open reading frame 63                                            | Unknown function                                         | -2.48 |
| Romo1        | reactive oxygen species modulator 1                                                      | Induces ROS production to stimulate cell proliferation   | -2.46 |
| Spsb4        | sp1A/ryanodine receptor domain and SOCS box containing 4                                 | Involved in ubiquitin-protein ligation                   | -2.46 |
| Lpin2        | lipin 2                                                                                  | Regulator of fatty acid metabolism                       | -2.44 |
| Mcoln1       | mucopolin 1                                                                              | Regulator of endo/exocytosis                             | -2.44 |
| Kif26a       | kinesin family member 26A                                                                | Modulator of enteric neuronal development                | -2.43 |
| Dedd         | death effector domain-containing                                                         | Modulator of Caspase 3 activity                          | -2.43 |
| Tcirg1       | T-cell, immune regulator 1, ATPase, H <sup>+</sup> transporting, lysosomal V0 subunit A3 | Proton channel involved in T-cell activation             | -2.43 |
| Idh2         | isocitrate dehydrogenase 2 (NADP <sup>+</sup> ), mitochondrial                           | Involved in energy production and metabolism             | -2.42 |
| Arhgef10     | Rho guanine nucleotide exchange factor 10                                                | Involved in development                                  | -2.42 |
| Med13        | mediator complex subunit 13                                                              | Co-activator of RNA polymerase II transcription          | -2.41 |
| Pign         | phosphatidylinositol glycan anchor biosynthesis, class N                                 | Involved in GPI-anchor biosynthesis                      | -2.41 |
| Smad5        | SMAD family member 5                                                                     | Transcriptional modulator                                | -2.41 |
| Procr        | protein C receptor, endothelial                                                          | Involved in protein C-mediated blood coagulation         | -2.40 |
| Znf618       | zinc finger protein 618                                                                  | May be involved in transcriptional regulation            | -2.40 |
| Acot2        | Acyl-CoA thioesterase 2                                                                  | Regulator of intracellular fatty acid levels             | -2.39 |
| Tcf4         | transcription factor 4, transcript variant 1                                             | Involved in cellular differentiation                     | -2.39 |
| Hsd12        | hydroxysteroid dehydrogenase like 2                                                      | Unknown function                                         | -2.39 |
| Ankrd28      | ankyrin repeat domain 28                                                                 | Involved in regulating TNF-alpha induced NFkB activation | -2.38 |
| LOC687609    | similar to ras homolog gene family, member f                                             | Unknown function                                         | -2.38 |
| Ndufa5       | NADH dehydrogenase (ubiquinone) 1 $\alpha$ subcomplex 5                                  | Involved in respiratory chain                            | -2.38 |
| Park7        | Parkinson disease (autosomal recessive, early onset) 7                                   | Redox sensitive chaperone                                | -2.38 |
| Smc2         | structural maintenance of chromosomes 2                                                  | Involved in DNA repair                                   | -2.37 |
| Malat1       | metastasis associated lung adenocarcinoma transcript 1                                   | Non-protein coding regulator of cell motility            | -2.36 |
| LOC100364467 | rCG36634-like                                                                            | Unknown function                                         | -2.34 |
| LOC682058    | similar to nucleolar protein with MIF4G domain 1                                         | Unknown function                                         | -2.33 |
| Fam64a       | family with sequence similarity 64, member A                                             | Unknown function                                         | -2.33 |
| Mnt          | max binding protein                                                                      | Regulator of cell growth                                 | -2.33 |
| Pbx1         | pre B-cell leukemia transcription factor 1                                               | Transcriptional regulator                                | -2.33 |
| Wfdc3        | WAP four-disulfide core domain 3                                                         | Protease inhibitor                                       | -2.32 |

|            |                                                             |                                                                               |       |
|------------|-------------------------------------------------------------|-------------------------------------------------------------------------------|-------|
| Mlt10      | myeloid (trithorax) homolog 10                              | Involved in transcriptional regulation                                        | -2.31 |
| Thsd4      | thrombospondin, type I, domain containing 4                 | Promotes ECM assembly                                                         | -2.31 |
| Adar       | adenosine deaminase, RNA-specific                           | Positive regulator of IL-2 expression in T-cells                              | -2.30 |
| Cdk7       | cyclin-dependent kinase 7                                   | Regulator of cell cycle progression                                           | -2.30 |
| RGD1305457 | similar to RIKEN cDNA 1700023M03                            | Unknown function                                                              | -2.30 |
| RGD1565983 | similar to apurinic/aprimidinic endonuclease 2              | Unknown function                                                              | -2.30 |
| Spon2      | spondin 2, extracellular matrix protein                     | Bacterial LPS binding ECM component that functions as opsonin for macrophages | -2.30 |
| Tulp4      | tubby like protein 4                                        | Ubiquitin-protein ligase component                                            | -2.30 |
| Zbtb4      | zinc finger and BTB domain containing 4                     | May be involved in transcriptional regulation                                 | -2.30 |
| Zfp347     | zinc finger protein 347                                     | Unknown function                                                              | -2.29 |
| Klf5       | Kruppel-like factor 5                                       | Transcriptional regulator                                                     | -2.28 |
| Cyp17a1    | cytochrome P450, family 17, subfamily a, polypeptide 1      | Involved in lipid biosynthesis                                                | -2.28 |
| Foxn3      | forkhead box N3                                             | Transcriptional repressor responding to DNA damage                            | -2.28 |
| Hgd        | homogentisate 1, 2-dioxygenase                              | Involved in amino acid catabolism                                             | -2.28 |
| Dapk3      | death-associated protein kinase 3                           | Regulator of apoptosis                                                        | -2.27 |
| Terf2      | telomeric repeat binding factor 2                           | Regulator of telomeric stability                                              | -2.27 |
| Neur1a     | neuronalized homolog 1A                                     | Unknown function                                                              | -2.26 |
| Kctd5      | potassium channel tetramerisation domain containing 5       | Ubiquitin ligase substrate adapter                                            | -2.25 |
| Tcf3       | transcription factor E3                                     | Activator of T-cell CD40L expression                                          | -2.25 |
| Eif2b3     | eukaryotic translation initiation factor 2B, subunit 3γ     | Involved in protein biosynthesis                                              | -2.25 |
| Ada        | adenosine deaminase                                         | Positive regulator of T-cell co-activator                                     | -2.24 |
| Slu7       | SLU7 splicing factor homolog                                | Involved in pre-mRNA splicing                                                 | -2.24 |
| Timp2      | tissue inhibitor of metalloproteinase 2                     | ECM Protease inhibitor                                                        | -2.24 |
| Tubgcp2    | tubulin, gamma complex associated protein 2                 | Involved in tubulin assembly                                                  | -2.24 |
| Cubn       | cubilin (intrinsic factor-cobalamin receptor)               | Co-transporter involved in iron metabolism                                    | -2.23 |
| Asx1       | additional sex combs like 1                                 | Involved in development                                                       | -2.23 |
| Abcc2      | ATP-binding cassette, sub-family C (CFTR/MRP), member 2     | Mediator of bile secretion                                                    | -2.22 |
| Hsf1       | heat shock transcription factor 1                           | Activates heat shock responsive genes                                         | -2.21 |
| Nubp1      | nucleotide binding protein 1                                | Involved in cytosolic Fe/S protein assembly                                   | -2.21 |
| Pnpla6     | patatin-like phospholipase domain containing 6              | Regulator of neuronal differentiation                                         | -2.21 |
| Sox4       | SRY-box 4                                                   | T-cell activator                                                              | -2.21 |
| F8         | coagulation factor VIII, procoagulant component             | Involved in blood coagulation                                                 | -2.21 |
| Pigy       | phosphatidylinositol glycan anchor biosynthesis, class Y    | Initiator of GPI anchor biosynthesis                                          | -2.20 |
| Atad2      | ATPase family, AAA domain containing 2                      | Involved in cell proliferation                                                | -2.19 |
| Osbpl3     | oxysterol binding protein-like 3                            | Intracellular lipid receptor                                                  | -2.19 |
| Vt1a       | vesicle transport through interaction with t-SNAREs 1B-like | Mediator of vesicle transport pathways                                        | -2.19 |
| Ccdc109a   | coiled-coil domain containing 109A                          | Unknown function                                                              | -2.18 |
| Rnf216     | ring finger protein 216                                     | Co-activator of Il-1 induced NF-κB activation                                 | -2.18 |
| Smad1      | stromal membrane-associated protein 1                       | Involved in clathrin-dependent endocytosis                                    | -2.18 |
| Npas2      | neuronal PAS domain protein 2                               | Transcriptional regulator                                                     | -2.17 |
| Smg7       | Smg-7 homolog, nonsense mediated mRNA decay factor          | Involved in nonsense-mediated mRNA decay                                      | -2.17 |
| Ard1a      | ARD1 homolog A, N-acetyltransferase                         | Mediator of n-α acetylation of proteins                                       | -2.17 |
| Timp1      | TIMP metalloproteinase inhibitor 1                          | ECM Protease inhibitor                                                        | -2.17 |



|           |                                                                     |                                                                 |       |
|-----------|---------------------------------------------------------------------|-----------------------------------------------------------------|-------|
| Clta      | clathrin, light chain (Lca)                                         | Mediator of endocytosis                                         | -2.16 |
| Mudeng    | MU-2/APIM2 domain containing, death-inducing                        | May be involved in apoptosis                                    | -2.16 |
| Pls3      | plastin 3 (T-isoform)                                               | Actin bundling protein in microvilli                            | -2.16 |
| Smurf1    | SMAD specific E3 ubiquitin protein ligase 1                         | Ubiquitin-protein ligase                                        | -2.16 |
| LOC680155 | hypothetical protein LOC680155                                      | Unknown function                                                | -2.16 |
| Dnajb5    | DnaJ (Hsp40) homolog, subfamily B, member 5                         | May be involved in protein folding and transport                | -2.15 |
| Ptpn12    | protein tyrosine phosphatase, non-receptor type 12                  | Signalling molecule involved in cell motility                   | -2.15 |
| Mall      | mal, T-cell differentiation protein-like                            | Involved in raft-mediated membrane trafficking                  | -2.15 |
| Ubxn2b    | UBX domain protein 2B                                               | Involved in maintenance of ER and Golgi                         | -2.15 |
| Nudt11    | nudix (nucleoside diphosphate linked moiety X)-type motif 11        | May play a role in signal transduction                          | -2.14 |
| C8g       | complement component 8, $\gamma$ polypeptide                        | Component of the membrane attack complex                        | -2.14 |
| Slc38a7   | solute carrier family 38, member 7                                  | Amino acid transporter                                          | -2.14 |
| Atxn2     | ataxin 2                                                            | Unknown function                                                | -2.13 |
| Tgfb1i1   | transforming growth factor 1 $\beta$ induced transcript 1           | Regulator of Tgfb and Wnt signalling pathways                   | -2.13 |
| Slc5a12   | solute carrier family 5, member 12                                  | Mediator of transport of monocarboxylates from intestinal lumen | -2.12 |
| Bat5      | HLA-B associated transcript 5                                       | May be involved in immune response                              | -2.12 |
| Acot1     | acyl-CoA thioesterase 1                                             | Regulator of intracellular acyl-CoA's                           | -2.11 |
| LOC681665 | similar to integrator complex subunit 6 isoform a                   | Unknown function                                                | -2.11 |
| Ipo11     | importin 11                                                         | Receptor for nuclear localization signals                       | -2.11 |
| Rnf114    | ring finger protein 114                                             | Involved in chromatin remodelling                               | -2.11 |
| Ncapd2    | non-SMC condensin I complex, subunit D2                             | Involved in protein degradation                                 | -2.11 |
| Psmc6     | proteasome (prosome, macropain) 26S subunit, ATPase, 6              | Steroid hormone receptor                                        | -2.10 |
| Paqr8     | progesterin and adipoQ receptor family member VIII                  | Regulator of microtubule interactions                           | -2.09 |
| Ppp4r2    | protein phosphatase 4, regulatory subunit 2                         | Unknown function                                                | -2.09 |
| Zfp445    | zinc finger protein 445                                             | Receptor for various ECM components                             | -2.08 |
| Itgb3     | integrin beta 3                                                     | Ubiquitin-protein ligase                                        | -2.08 |
| Ube2q1    | ubiquitin-conjugating enzyme E2Q (putative) 1                       | Involved in microtubule-dependent cell motility                 | -2.08 |
| Hdac6     | histone deacetylase 6                                               | Unknown function                                                | -2.07 |
| Fam82a1   | family with sequence similarity 82, member A1                       | May be involved in mRNA splicing                                | -2.07 |
| Luc7l     | LUC7-like                                                           | Involved in T-cell receptor and leptin receptor signaling       | -2.07 |
| Khdrbs1   | KH domain containing, RNA binding, signal transduction associated 1 | Stabilizes actin cytoskeleton                                   | -2.07 |
| Tpm3      | tropomyosin 3 $\gamma$                                              | Regulates stabilization of actin filaments                      | -2.07 |
| Fam24a    | family with sequence similarity 24, member A                        | Unknown function                                                | -2.06 |
| Inpp11    | inositol polyphosphate phosphatase-like 1                           | Regulator of actin cytoskeleton remodelling                     | -2.06 |
| Ptpcr     | protein tyrosine phosphatase, receptor type, C                      | Positive regulator of T-cell co-activation                      | -2.06 |
| Terf1     | telomeric repeat binding factor (NIMA-interacting) 1                | Involved in telomeric regulation                                | -2.06 |
| Mrpl51    | mitochondrial ribosomal protein L51                                 | Component of the mitochondrial ribosome                         | -2.05 |
| Sfrs14    | splicing factor, arginine/serine-rich 14                            | May play a role in mRNA splicing                                | -2.05 |
| Psd3      | pleckstrin and Sec7 domain containing 3                             | Unknown function                                                | -2.05 |
| Slc30a3   | solute carrier family 30 (zinc transporter), member 3               | Zinc transporter                                                | -2.05 |
| Speg      | SPEG complex locus                                                  | Regulator of cytoskeletal development                           | -2.05 |
| Abhd12    | abhydrolase domain containing 12                                    | Unknown function                                                | -2.04 |
| Acbd3     | acyl-Coenzyme A binding domain containing 3                         | Involved in maintenance of Golgi                                | -2.04 |

|         |                                                                            |                                                |       |
|---------|----------------------------------------------------------------------------|------------------------------------------------|-------|
| Adarb1  | adenosine deaminase, RNA-specific, B1                                      | Involved in RNA editing                        | -2.04 |
| Cela2a  | chymotrypsin-like elastase family, member 2A                               | Elastin (ECM component) specific protease      | -2.04 |
| Ints1   | integrator complex subunit 1                                               | Involved in small nuclear RNA processing       | -2.04 |
| Itpkc   | inositol 1,4,5-trisphosphate 3-kinase C                                    | Involved in nuclear export/import              | -2.04 |
| Rcn1    | Reticulocalbin 1, EF-hand calcium binding domain                           | Regulator of Ca-dependent activities in the ER | -2.04 |
| Clcn5   | chloride channel 5                                                         | Mediator of acidification of endosomal lumen   | -2.04 |
| Abo     | ABO blood group                                                            | Blood group antigen protein                    | -2.03 |
| Ankrd16 | ankyrin repeat domain 16                                                   | Unknown function                               | -2.03 |
| Mt2A    | metallothionein 2A                                                         | Heavy metal responsive protein                 | -2.03 |
| Retsat  | retinol saturase (all trans retinol 13,14 reductase)                       | May be involved in vitamin A metabolism        | -2.03 |
| Slc4a10 | solute carrier family 4, sodium bicarbonate co-transporter-like, member 10 | Regulator of intracellular pH                  | -2.03 |
| Luc7l3  | LUC7-like 3                                                                | Involved in mRNA splicing                      | -2.02 |
| Mfsd7b  | major facilitator superfamily domain containing 7B                         | Heme transporter                               | -2.02 |
| Cox4i1  | cytochrome c oxidase subunit IV isoform 1                                  | Involved in mitochondrial respiratory chain    | -2.02 |
| Hunk    | hormonally up-regulated neu tumor-associated kinase                        | Unknown function                               | -2.02 |
| Mbnl1   | muscleblind-like 1                                                         | Mediator of pre-mRNA splicing                  | -2.02 |
| Scaper  | S-phase cyclin A-associated protein in the ER                              | Regulator of cell cycle progression            | -2.02 |
| Serf2   | small EDRK-rich factor 2                                                   | Unknown function                               | -2.02 |
| Chst3   | carbohydrate (chondroitin 6/keratan) sulfotransferase 3                    | May play a role in maintenance of T-cells      | -2.02 |
| Eftud2  | elongation factor Tu GTP binding domain containing 2                       | Involved in pre-mRNA splicing                  | -2.02 |
| Maf     | v-maf AS42 oncogene homolog                                                | Developmental regulator                        | -2.02 |
| Brd1    | bromodomain containing 1                                                   | Unknown function                               | -2.01 |
| Cdc45l  | CDC45 cell division cycle 45-like                                          | Involved in DNA replication                    | -2.01 |
| Rbbp5   | retinoblastoma binding protein 5                                           | Regulator of cell proliferation                | -2.01 |
| Traf6   | Tnf receptor-associated factor 6                                           | NFκB signal transducer                         | -2.01 |
| Gnb1    | guanine nucleotide binding protein (G protein), beta polypeptide 1         | Modulator of transmembrane signalling systems  | -2.01 |
| Mttr12  | myotubularin related protein 12                                            | Unknown function                               | -2.00 |
| Slbp    | stem-loop binding protein                                                  | May be involved in cell cycle                  | -2.00 |
| A2l1d1  | AIG2-like domain 1                                                         | Involved in protein degradation                | -2.00 |
| Aqp7    | aquaporin 7                                                                | Water/glycerol channel                         | -2.00 |
| Mfap3   | microfibrillar-associated protein 3                                        | Unknown function                               | -2.00 |

**Table S6. Up- and down-regulated genes shared between P2 and P9 data sets**

| Gene Symbol  | Description                                                       | Function                                                                | Mean-fold change <sup>1</sup> |
|--------------|-------------------------------------------------------------------|-------------------------------------------------------------------------|-------------------------------|
| RT1-Aw2      | RT1 class Ib, locus Aw2                                           | Antigen presentation                                                    | 17.7/4.00                     |
| Cirbp        | cold inducible RNA binding protein                                | Positive regulator of cellular stress response                          | 5.04                          |
| Xiap         | X-linked inhibitor of apoptosis                                   | Apoptotic suppressor                                                    | 3.91/2.52                     |
| LOC81816     | hypothetical protein LOC81816                                     | Putative ubiquitin conjugating enzyme                                   | 3.39                          |
| Rbm9         | RNA binding motif protein 9                                       | Regulates splicing of tissue specific exons                             | 2.74                          |
| Reg3b        | regenerating islet-derived 3 $\beta$                              | Antimicrobial peptide with C-type lectin domain                         | 2.63                          |
| Sox4         | SRY (sex determining region Y)-box 4                              | Transcriptional activator that binds to T-cell enhancer motifs          | 2.61/2.22                     |
| Pik3r1       | phosphoinositide-3-kinase, regulatory subunit 1 $\alpha$          | Adaptor mediating association of activated kinases with plasma membrane | 2.60/2.74                     |
| Hoxb6        | homeobox B6                                                       | Transcriptional regulator                                               | 2.58                          |
| Ankle2       | ankyrin repeat and LEM domain containing 2                        | Unknown function                                                        | 2.40                          |
| Vdac1        | voltage-dependent anion channel 1                                 | Mitochondrial membrane channel involved in apoptosis                    | 2.38                          |
| Id3          | inhibitor of DNA binding 3                                        | Inhibitor of transcription factor DNA binding                           | 2.29                          |
| Pafah1b1     | platelet-activating factor acetylhydrolase, isoform 1b, subunit 1 | Required for proper activation of Rho GTPases and actin polymerization  | 2.28                          |
| Vezf1        | vascular endothelial zinc finger 1                                | Regulation of IL-3 expression                                           | 2.23/2.36                     |
| Gata2b       | GATA zinc finger domain containing 2B                             | Transcriptional repressor                                               | 2.21                          |
| Rnf6         | ring finger protein (C3H2C3 type) 6                               | Ubiquitin-protein ligase                                                | 2.20                          |
| Krt15        | keratin 15                                                        | Responsible for the structural integrity of epithelial cells            | 2.18                          |
| Ptprs        | protein tyrosine phosphatase, receptor type, S                    | Signalling protein involved in development                              | 2.17                          |
| Lgr4         | leucine-rich repeat containing G protein-coupled receptor 4       | Orphan receptor                                                         | 2.09/2.35                     |
| Rod1         | ROD1 regulator of differentiation 1                               | Regulator of cell differentiation                                       | 2.06                          |
| Eef1a1       | eukaryotic translation elongation factor 1 $\alpha$ 1             | Prompter of protein biosynthesis                                        | 2.03                          |
| Nolc1        | nucleolar and coiled-body phosphoprotein 1                        | Involved in RNA polymerase I catalysed transcription                    | 2.02/2.4                      |
| RT1-A3       | RT1 class I, locus A3                                             | Antigen presentation                                                    | -3.11                         |
| Mcpt3        | mast cell peptidase 3                                             | Serine endopeptidase                                                    | -2.62                         |
| RT1-Db1      | RT1 class II, locus Db1                                           | Antigen presentation                                                    | -2.46                         |
| Pbx1         | pre-B-cell leukemia transcription factor                          | Transcriptional regulator                                               | -2.36                         |
| Pim1         | pim-1 oncogene                                                    | Signalling kinase activity                                              | -2.35                         |
| LOC100362483 | H2-GS14-2 antigen                                                 | Regulation of antigen presentation                                      | -2.29                         |
| Wwc1         | WW and C2 domain containing 1                                     | Transcriptional activator                                               | -2.15                         |
| Amy1 ; Amy2  | amylase, alpha 1A (salivary), amylase 2, pancreatic               | Hydrolase                                                               | -2.03                         |

<sup>1</sup>In most cases there was complete concordance between the extent of gene modulation at P2 and P9; two values are shown when there were quantitative differences between values from the two sets of animals (P2 ranked and shown first).

## **Supplemental methods**

### ***E. coli* K1 *neuS*-based qPCR assay**

Culture methods for detecting *E. coli* K1 in stool and tissue samples are laborious and relatively insensitive; a qPCR assay based on amplification of the *neuS* gene of the K1-capsule biosynthesis and export *kps* gene cluster using a specific primer pair was developed.

#### **Validation of the qPCR assay**

The utility of *neuS* qPCR for the quantification of *E. coli* K1 was examined by real-time monitoring of PCR using *E. coli* K1 DNA as a genomic standard and by generation of reproducible standard curves. The use of the technique in quantifying *E. coli* K1 from intestinal tissue and stool DNA extractions was validated by spiking samples with A192PP DNA prior to qPCR.

Total genomic DNA was extracted in triplicate from standardized cultures of A192PP; DNA extracts were serially diluted to produce a range of DNA dilutions for use as qPCR standards. This range covered genomic DNA corresponding to  $10^1$ - $10^7$  A192PP CFU. Representative data produced by real-time monitoring of PCR reactions utilizing these standards as template DNA is shown in Fig. S3. Amplification of PCR products was detected in all dilutions tested but not in no-template controls (Fig. S3A), demonstrating that this method was able to detect  $\leq 10$  genome copies. Melt-curve analysis detected a single PCR product with an estimated  $T_m$  of 78 °C (Fig. S3B). The  $C_t$  values produced by amplification of standard DNA from replicate cultures were highly reproducible, allowed the generation of standard curves (Fig. S3C) and facilitated the determination of PCR efficiencies, which ranged from 96-102%. Thus, *neuS* PCR falls within the parameters required for accurate qPCR-based quantification and represents a valid method for quantification of *E. coli* K1.

Sample spiking was used to determine the capacity of the qPCR assay to quantify *E. coli* K1 DNA from samples containing complex mixtures of bacterial and host DNA. DNA was extracted from four adult stools and neonatal tissue homogenates containing no *E. coli* K1 detected by culture and phage typing. PCRs containing these DNA extracts were spiked with known quantities of A192PP DNA representing a range of  $10^1$ - $10^6$  CFU. *E. coli* K1 was quantified by *neuS* qPCR and the results compared to spiked CFU values (Fig. S4). Within the  $10^1$ - $10^5$  CFU spike range, no significant differences were observed between spike

inoculum CFU values and qPCR results derived from analysis of DNA extracted from either stool or tissue homogenates. However, significantly less *E. coli* K1 was detected by qPCR in both sample types in assays utilizing a  $10^6$  CFU spike. Melt-curve analysis of PCRs from spiked samples indicated a single amplification product with the same  $T_m$  as observed previously. No amplification was observed in non-spiked stool and tissue samples. These results demonstrate the capacity of the *neuS* qPCR assay to quantify *E. coli* K1 DNA from adult and neonatal intestinal DNA extracts and shows that the upper limit of detection of the assay is  $\sim 10^5$  CFU for each PCR.

### **Comparison of culture/phage and qPCR methods for examination of animal samples**

The capacity of the *neuS* qPCR method to quantify *E. coli* K1 from animal samples was compared to ‘gold-standard’ culture and phage typing (Fig. S5). DNA was extracted from the intestinal tissue homogenates of 24 P2 neonatal pups and stool homogenates from twelve adult rats colonized with A192PP. *E. coli* K1 was quantified by qPCR or by culture of homogenates and subsequent phage typing of coliform isolates; CFU/g values were compared and two sub-populations resolved. With the majority of samples, there was a strong correlation between culture/phage and qPCR data for both tissue (n=21) and stool (n=8), with Spearman  $R^2$  values of 0.87 and 0.95 respectively. However, a minority of tissue (n=4) and stool (n=4) samples yielded *E. coli* K1 by qPCR but not by culture/phage typing. Melt-curve analysis of DNA amplified from these samples indicated a single product with the same  $T_m$  as the *neuS* amplification product. Moreover, the CFU/g values determined by qPCR were either near or below the LOD for culture and phage typing, as determined previously by normalization to mean tissue and stool mass, indicating that qPCR detected *E. coli* K1 from samples that were negative by culture/phage typing. Calculation of qPCR LOD values for both sample types, based on the dilution steps required for DNA extraction and the sensitivity of the qPCR assay, showed that qPCR was 62.5-fold more sensitive for quantification of *E. coli* K1 than culture/phage typing. Taken as a whole, these results demonstrate that quantification of *E. coli* K1 by qPCR assay was more sensitive and more reliable than culture and phage typing.

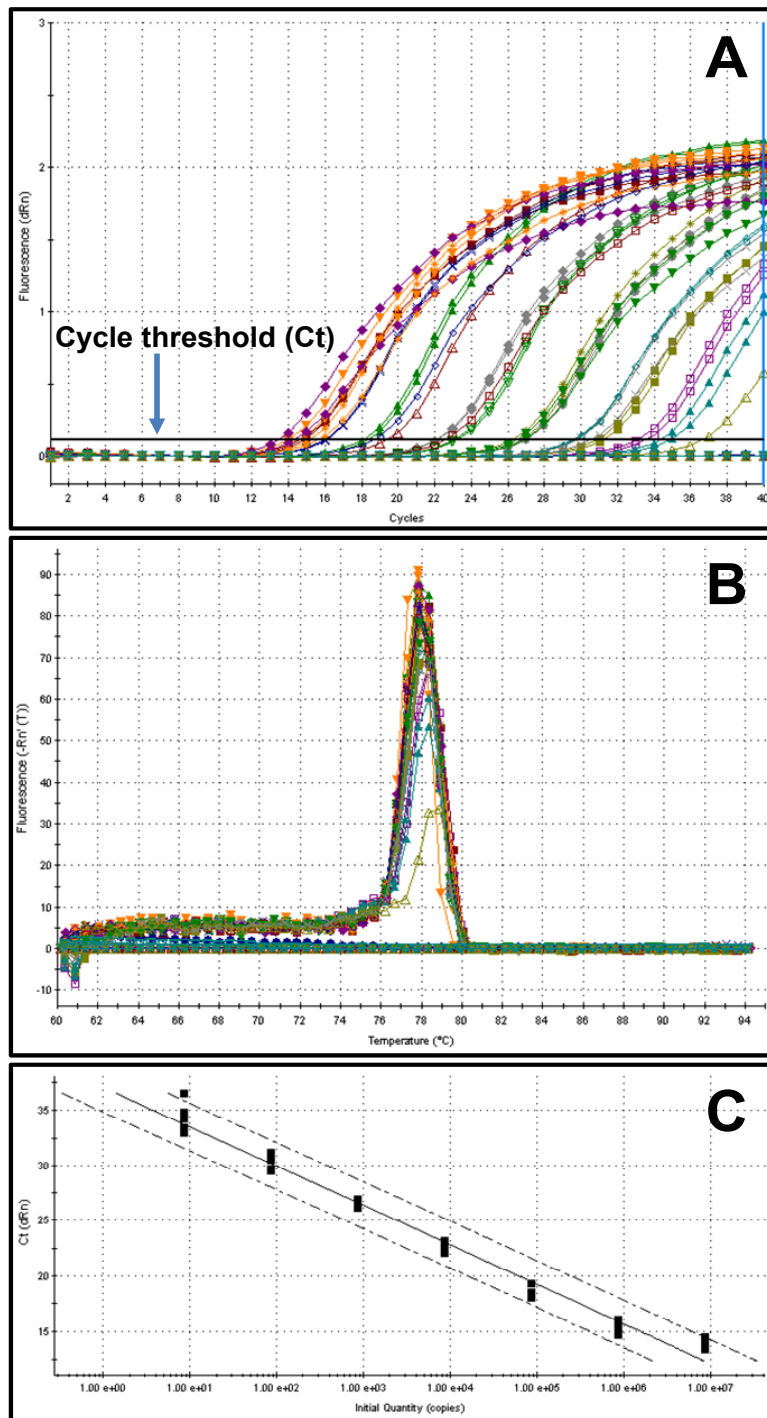

**Figure S3.** qPCR of the neuS gene using tenfold serial dilutions of A192PP DNA. Quantities of DNA corresponding to  $10^1$ - $10^7$  CFU were amplified by PCR and reactions monitored in real-time. (A) PCR cycle number against fluorescence. Post-amplification reactions were subjected to melt-curve analysis (B), comparing temperature and  $\Delta$ (fluorescence). Standard curves (C) were constructed by plotting copy number (CFU) against Ct values obtained in A. The cycle threshold is indicated in (A) and the 95% confidence interval (----) in (C).

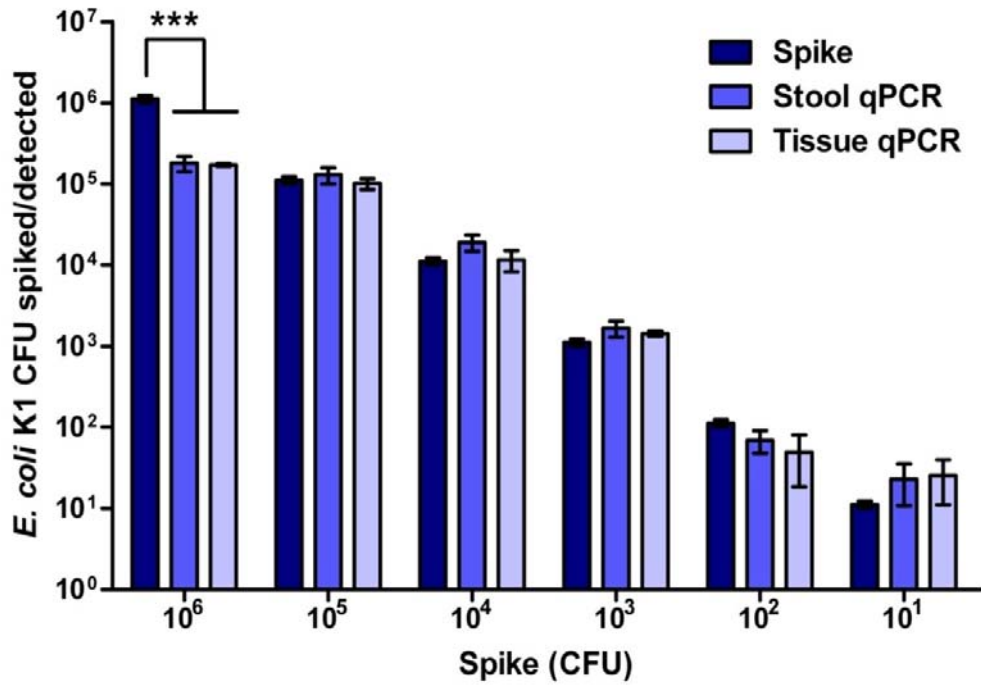

**Figure S4.** *E. coli* K1 detected by qPCR of DNA extracted from adult stool and neonatal tissue homogenates spiked with known quantities of A192PP DNA. Error bars represent the SEM from four independent experiments. Differences determined by 2 way ANOVA are indicated (\*\*\*) p<0.001).

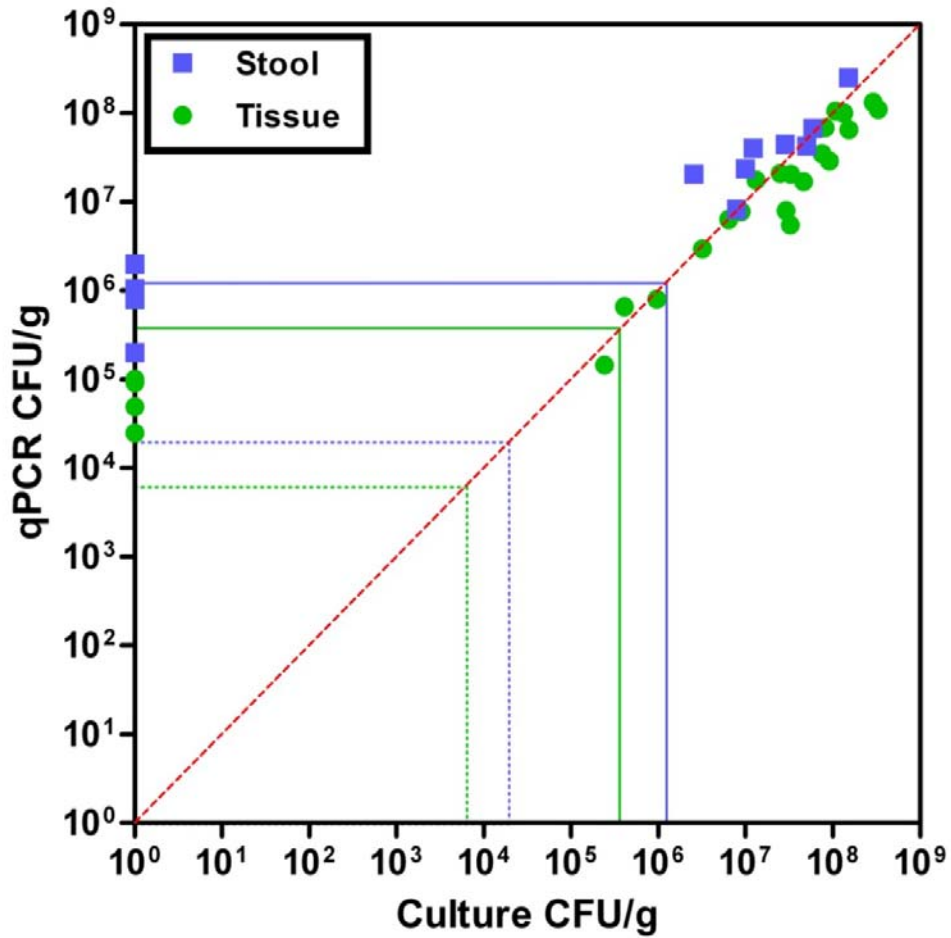

**Figure S5.** Comparison of *E. coli* K1 CFU/g detected by qPCR and culture methods. *E. coli* K1 was quantified from 24 neonatal tissue and twelve adult stool homogenates from A192PP-colonized animals. The LODs of culture (solid lines) and qPCR (dotted lines) are indicated for stool (blue) and tissue (green) samples.  $R^2 = 1$  (perfect correlation; ----).
